# Supplementary material for: Isolation and Biochemical Characterization of Six Anaerobic Fungal Strains from Zoo Animal Feces
Source: MDPI journal article supplement (doi:10.3390/microorganisms9081655), 2021-08-03
Supplement: s1 [file s1]

Table S3: Residual galactose during growth of different strains on Lactose in g/l and mmol.

| Strain | g/l   |       |       |       |       | mmol  |       |       |       |       |
|--------|-------|-------|-------|-------|-------|-------|-------|-------|-------|-------|
|        | 1     | 2     | 3     | Ø     | SD    | 1     | 2     | 3     | Ø     | SD    |
| G341   | 0,790 | 1,017 | 0,961 | 0,923 | 0,096 | 0,241 | 0,310 | 0,293 | 0,282 | 0,029 |
| PP313  | 1,823 | 2,070 | 1,982 | 1,958 | 0,102 | 0,556 | 0,632 | 0,605 | 0,598 | 0,031 |
| W212   | 1,982 | 2,008 | 2,067 | 2,019 | 0,035 | 0,605 | 0,613 | 0,631 | 0,616 | 0,011 |
| SA222  | 1,928 | 1,981 | 1,868 | 1,926 | 0,046 | 0,589 | 0,605 | 0,570 | 0,588 | 0,014 |
| X2152  | 1,501 | 1,501 | 0,999 | 1,334 | 0,237 | 0,458 | 0,458 | 0,305 | 0,407 | 0,072 |
| A252   | 0,175 | 0,125 | 0,118 | 0,139 | 0,025 | 0,053 | 0,038 | 0,036 | 0,043 | 0,008 |

Tab. S4: Produced metabolites from G341 while growing on different c-sources including standard deviation (SD) and excluding ethanol.

|                        | Formate $\Delta$<br>[mmol] | Acetate $\Delta$<br>[mmol] | Lactate $\Delta$<br>[mmol] | Succinate $\Delta$<br>[mmol] | Citrate $\Delta$<br>[mmol] | H <sub>2</sub> $\Delta$<br>[mmol] |
|------------------------|----------------------------|----------------------------|----------------------------|------------------------------|----------------------------|-----------------------------------|
| Cellobiose $\emptyset$ | 1,510                      | 1,251                      | 0,792                      | 0,105                        | 0,000                      | 0,358                             |
| Cellobiose SD          | 0,082                      | 0,067                      | 0,041                      | 0,003                        | 0,000                      | 0,047                             |
| Cellulose $\emptyset$  | 1,437                      | 1,073                      | 0,914                      | 0,114                        | 0,000                      | 0,313                             |
| Cellulose SD           | 0,026                      | 0,015                      | 0,038                      | 0,002                        | 0,000                      | 0,030                             |
| Fructose $\emptyset$   | 1,503                      | 1,225                      | 0,757                      | 0,133                        | 0,000                      | 0,232                             |
| Fructose SD            | 0,103                      | 0,114                      | 0,071                      | 0,008                        | 0,000                      | 0,007                             |
| Glucose $\emptyset$    | 1,398                      | 1,174                      | 0,725                      | 0,126                        | 0,000                      | 0,312                             |
| Glucose SD             | 0,054                      | 0,041                      | 0,037                      | 0,008                        | 0,000                      | 0,023                             |
| Inulin $\emptyset$     | 1,138                      | 1,050                      | 0,572                      | 0,112                        | 0,000                      | 0,282                             |
| Inulin SD              | 0,127                      | 0,167                      | 0,102                      | 0,009                        | 0,000                      | 0,032                             |
| Lactose $\emptyset$    | 0,607                      | 0,415                      | 0,058                      | 0,000                        | 0,000                      | 0,220                             |
| Lactose SD             | 0,044                      | 0,042                      | 0,009                      | 0,000                        | 0,000                      | 0,010                             |
| Maltose $\emptyset$    | 1,356                      | 1,217                      | 0,766                      | 0,125                        | 0,000                      | 0,366                             |
| Maltose SD             | 0,043                      | 0,034                      | 0,064                      | 0,001                        | 0,000                      | 0,007                             |
| Mannose $\emptyset$    | 1,309                      | 0,991                      | 0,498                      | 0,108                        | 0,000                      | 0,360                             |
| Mannose SD             | 0,110                      | 0,109                      | 0,095                      | 0,003                        | 0,000                      | 0,036                             |
| Pectin $\emptyset$     | 0,138                      | 0,000                      | 0,000                      | 0,000                        | 0,000                      | 0,025                             |
| Pectin SD              | 0,004                      | 0,000                      | 0,000                      | 0,000                        | 0,000                      | 0,005                             |
| Starch $\emptyset$     | 1,388                      | 1,161                      | 0,610                      | 0,112                        | 0,000                      | 0,307                             |
| Starch SD              | 0,168                      | 0,112                      | 0,108                      | 0,019                        | 0,000                      | 0,004                             |
| Stroh $\emptyset$      | 1,017                      | 0,770                      | 0,140                      | 0,000                        | 0,011                      | 0,352                             |
| Stroh SD               | 0,032                      | 0,053                      | 0,038                      | 0,000                        | 0,000                      | 0,011                             |
| Sucrose $\emptyset$    | 1,475                      | 1,327                      | 0,852                      | 0,136                        | 0,000                      | 0,335                             |
| Sucrose SD             | 0,026                      | 0,077                      | 0,067                      | 0,003                        | 0,000                      | 0,033                             |
| Trehalose $\emptyset$  | 0,000                      | 0,000                      | 0,000                      | 0,000                        | 0,000                      | 0,008                             |
| Trehalose SD           | 0,000                      | 0,000                      | 0,000                      | 0,000                        | 0,000                      | 0,003                             |
| Xylan $\emptyset$      | 1,144                      | 0,848                      | 0,264                      | 0,096                        | 0,064                      | 0,211                             |
| Xylan SD               | 0,017                      | 0,010                      | 0,010                      | 0,003                        | 0,000                      | 0,012                             |
| Xylose $\emptyset$     | 1,449                      | 1,368                      | 0,713                      | 0,117                        | 0,000                      | 0,278                             |
| Xylose SD              | 0,063                      | 0,180                      | 0,016                      | 0,003                        | 0,000                      | 0,016                             |

Tab. S5: Relative produced metabolites from G341 while growing on different c-sources including standard deviation (SD) and excluding ethanol.

|               | Formate/total [%] | Acetate/total [%] | Lactate/total [%] | Succinate/total [%] | Citrate/total [%] | H2/total [%] |
|---------------|-------------------|-------------------|-------------------|---------------------|-------------------|--------------|
| Cellobiose Ø  | 37,641            | 31,138            | 19,710            | 2,603               | 0,000             | 8,908        |
| Cellobiose SD | 2,678             | 1,124             | 0,642             | 0,046               | 0,000             | 1,062        |
| Cellulose Ø   | 37,334            | 27,882            | 23,718            | 2,952               | 0,000             | 8,115        |
| Cellulose SD  | 1,148             | 0,269             | 0,576             | 0,046               | 0,000             | 0,654        |
| Fructose Ø    | 39,098            | 31,754            | 19,654            | 3,445               | 0,000             | 6,050        |
| Fructose SD   | 2,952             | 1,885             | 1,502             | 0,196               | 0,000             | 0,379        |
| Glucose Ø     | 37,411            | 31,432            | 19,411            | 3,380               | 0,000             | 8,366        |
| Glucose SD    | 1,277             | 1,261             | 0,914             | 0,208               | 0,000             | 0,656        |
| Inulin Ø      | 36,255            | 33,187            | 18,014            | 3,583               | 0,000             | 8,962        |
| Inulin SD     | 1,134             | 0,785             | 0,814             | 0,307               | 0,000             | 0,230        |
| Lactose Ø     | 46,703            | 31,874            | 4,444             | 0,000               | 0,000             | 16,979       |
| Lactose SD    | 0,487             | 0,806             | 0,363             | 0,000               | 0,000             | 0,672        |
| Maltose Ø     | 35,424            | 31,794            | 19,971            | 3,256               | 0,000             | 9,554        |
| Maltose SD    | 0,598             | 0,270             | 1,051             | 0,123               | 0,000             | 0,361        |
| Mannose Ø     | 40,201            | 30,348            | 15,094            | 3,328               | 0,000             | 11,029       |
| Mannose SD    | 1,046             | 0,156             | 1,395             | 0,318               | 0,000             | 0,236        |
| Pectin Ø      | 84,606            | 0,000             | 0,000             | 0,000               | 0,000             | 15,394       |
| Pectin SD     | 2,213             | 0,000             | 0,000             | 0,000               | 0,000             | 2,213        |
| Starch Ø      | 38,758            | 32,533            | 16,906            | 3,108               | 0,000             | 8,695        |
| Starch SD     | 0,934             | 1,180             | 1,263             | 0,231               | 0,000             | 1,026        |
| Stroh Ø       | 44,424            | 33,636            | 6,098             | 0,000               | 0,472             | 15,370       |
| Stroh SD      | 1,078             | 2,408             | 1,629             | 0,000               | 0,005             | 0,634        |
| Sucrose Ø     | 35,763            | 32,155            | 20,653            | 3,300               | 0,000             | 8,130        |
| Sucrose SD    | 0,902             | 1,588             | 1,564             | 0,098               | 0,000             | 0,782        |
| Trehalose Ø   | 0,000             | 0,000             | 0,000             | 0,000               | 0,000             | 100,000      |
| Trehalose SD  | 0,000             | 0,000             | 0,000             | 0,000               | 0,000             | 0,000        |
| Xylan Ø       | 43,546            | 32,290            | 10,063            | 3,638               | 2,425             | 8,038        |
| Xylan SD      | 0,446             | 0,309             | 0,332             | 0,140               | 0,009             | 0,480        |
| Xylose Ø      | 36,993            | 34,695            | 18,224            | 2,996               | 0,000             | 7,092        |
| Xylose SD     | 1,036             | 2,291             | 0,942             | 0,242               | 0,000             | 0,095        |

Tab. S6: Produced metabolites from PP313 while growing on different c-sources including standard deviation (SD) and excluding ethanol.

|                        | Formate $\Delta$<br>[mmol] | Acetate $\Delta$<br>[mmol] | Lactate $\Delta$<br>[mmol] | Succinate $\Delta$<br>[mmol] | Citrate $\Delta$<br>[mmol] | H2 $\Delta$<br>[mmol] |
|------------------------|----------------------------|----------------------------|----------------------------|------------------------------|----------------------------|-----------------------|
| Cellobiose $\emptyset$ | 1,319                      | 1,005                      | 0,676                      | 0,194                        | 0,000                      | 0,547                 |
| Cellobiose SD          | 0,043                      | 0,024                      | 0,074                      | 0,002                        | 0,000                      | 0,026                 |
| Cellulose $\emptyset$  | 0,000                      | 0,000                      | 0,071                      | 0,000                        | 0,000                      | 0,022                 |
| Cellulose SD           | 0,000                      | 0,000                      | 0,052                      | 0,000                        | 0,000                      | 0,006                 |
| Fructose $\emptyset$   | 1,195                      | 0,892                      | 0,608                      | 0,140                        | 0,000                      | 0,475                 |
| Fructose SD            | 0,119                      | 0,072                      | 0,069                      | 0,011                        | 0,000                      | 0,047                 |
| Glucose $\emptyset$    | 1,165                      | 0,647                      | 0,711                      | 0,156                        | 0,000                      | 0,488                 |
| Glucose SD             | 0,086                      | 0,136                      | 0,052                      | 0,017                        | 0,000                      | 0,019                 |
| Inulin $\emptyset$     |                            |                            |                            |                              |                            |                       |
| Inulin SD              |                            |                            |                            |                              |                            |                       |
| Lactose $\emptyset$    | 0,850                      | 0,703                      | 0,143                      | 0,106                        | 0,000                      | 0,344                 |
| Lactose SD             | 0,037                      | 0,062                      | 0,023                      | 0,016                        | 0,000                      | 0,018                 |
| Maltose $\emptyset$    | 0,000                      | 0,000                      | 0,053                      | 0,000                        | 0,000                      | 0,027                 |
| Maltose SD             | 0,000                      | 0,000                      | 0,038                      | 0,000                        | 0,000                      | 0,002                 |
| Mannose $\emptyset$    |                            |                            |                            |                              |                            |                       |
| Mannose SD             |                            |                            |                            |                              |                            |                       |
| Pectin $\emptyset$     | 0,000                      | 0,228                      | 0,116                      | 0,000                        | 0,000                      | 0,009                 |
| Pectin SD              | 0,000                      | 0,162                      | 0,007                      | 0,000                        | 0,000                      | 0,003                 |
| Starch $\emptyset$     | 0,000                      | 0,107                      | 0,080                      | 0,000                        | 0,000                      | 0,017                 |
| Starch SD              | 0,000                      | 0,151                      | 0,001                      | 0,000                        | 0,000                      | 0,001                 |
| Stroh $\emptyset$      | 0,592                      | 0,527                      | 0,115                      | 0,000                        | 0,009                      | 0,322                 |
| Stroh SD               | 0,004                      | 0,007                      | 0,009                      | 0,000                        | 0,006                      | 0,008                 |
| Sucrose $\emptyset$    |                            |                            |                            |                              |                            |                       |
| Sucrose SD             |                            |                            |                            |                              |                            |                       |
| Trehalose $\emptyset$  |                            |                            |                            |                              |                            |                       |
| Trehalose SD           |                            |                            |                            |                              |                            |                       |
| Xylan $\emptyset$      | 1,098                      | 0,891                      | 0,310                      | 0,160                        | 0,046                      | 0,337                 |
| Xylan SD               | 0,019                      | 0,043                      | 0,019                      | 0,014                        | 0,001                      | 0,012                 |
| Xylose $\emptyset$     | 1,093                      | 0,836                      | 0,772                      | 0,130                        | 0,000                      | 0,400                 |
| Xylose SD              | 0,068                      | 0,056                      | 0,157                      | 0,017                        | 0,000                      | 0,008                 |

Tab. S7: Relative produced metabolites from PP313 while growing on different c-sources including standard deviation (SD) and excluding ethanol.

|               | Formate/total [%] | Acetate/total [%] | Lactate/total [%] | Succinate/total [%] | Citrate/total [%] | H2/total [%] |
|---------------|-------------------|-------------------|-------------------|---------------------|-------------------|--------------|
| Cellobiose Ø  | 35,251            | 26,875            | 18,036            | 5,177               | 0,000             | 14,661       |
| Cellobiose SD | 0,144             | 0,365             | 1,396             | 0,122               | 0,000             | 1,069        |
| Cellulose Ø   | 0,000             | 0,000             | 56,384            | 0,000               | 0,000             | 43,616       |
| Cellulose SD  | 0,000             | 0,000             | 40,128            | 0,000               | 0,000             | 40,128       |
| Fructose Ø    | 36,033            | 26,932            | 18,402            | 4,226               | 0,000             | 14,406       |
| Fructose SD   | 0,941             | 0,486             | 1,709             | 0,121               | 0,000             | 1,548        |
| Glucose Ø     | 36,839            | 20,222            | 22,509            | 4,918               | 0,000             | 15,511       |
| Glucose SD    | 0,794             | 2,503             | 0,828             | 0,322               | 0,000             | 1,067        |
| Inulin Ø      |                   |                   |                   |                     |                   |              |
| Inulin SD     |                   |                   |                   |                     |                   |              |
| Lactose Ø     | 39,633            | 32,711            | 6,638             | 4,974               | 0,000             | 16,043       |
| Lactose SD    | 0,559             | 1,265             | 0,795             | 0,977               | 0,000             | 0,102        |
| Maltose Ø     | 0,000             | 0,000             | 49,627            | 0,000               | 0,000             | 50,373       |
| Maltose SD    | 0,000             | 0,000             | 35,097            | 0,000               | 0,000             | 35,097       |
| Mannose Ø     |                   |                   |                   |                     |                   |              |
| Mannose SD    |                   |                   |                   |                     |                   |              |
| Pectin Ø      | 0,000             | 49,338            | 46,641            | 0,000               | 0,000             | 4,020        |
| Pectin SD     | 0,000             | 34,946            | 31,316            | 0,000               | 0,000             | 3,634        |
| Starch Ø      | 0,000             | 25,467            | 61,337            | 0,000               | 0,000             | 13,197       |
| Starch SD     | 0,000             | 36,015            | 29,593            | 0,000               | 0,000             | 6,580        |
| Stroh Ø       | 37,809            | 33,694            | 7,333             | 0,000               | 0,568             | 20,596       |
| Stroh SD      | 0,487             | 0,165             | 0,475             | 0,000               | 0,415             | 0,551        |
| Sucrose Ø     |                   |                   |                   |                     |                   |              |
| Sucrose SD    |                   |                   |                   |                     |                   |              |
| Trehalose Ø   |                   |                   |                   |                     |                   |              |
| Trehalose SD  |                   |                   |                   |                     |                   |              |
| Xylan Ø       | 38,647            | 31,334            | 10,886            | 5,642               | 1,625             | 11,866       |
| Xylan SD      | 0,322             | 0,957             | 0,496             | 0,498               | 0,015             | 0,673        |
| Xylose Ø      | 33,870            | 25,886            | 23,821            | 4,030               | 0,000             | 12,394       |
| Xylose SD     | 2,648             | 1,657             | 4,450             | 0,594               | 0,000             | 0,458        |

Tab. S8: Produced metabolites from W212 while growing on different c-sources including standard deviation (SD) and excluding ethanol.

|               | Formate Δ<br>[mmol] | Acetate Δ<br>[mmol] | Lactate Δ<br>[mmol] | Succinate Δ<br>[mmol] | Citrate Δ<br>[mmol] | H <sub>2</sub> Δ<br>[mmol] |
|---------------|---------------------|---------------------|---------------------|-----------------------|---------------------|----------------------------|
| Cellobiose Ø  | 1,890               | 1,191               | 0,314               | 0,000                 | 0,000               | 0,211                      |
| Cellobiose SD | 0,081               | 0,058               | 0,015               | 0,000                 | 0,000               | 0,031                      |
| Cellulose Ø   | 1,729               | 1,413               | 0,552               | 0,000                 | 0,000               | 0,367                      |
| Cellulose SD  | 0,030               | 0,018               | 0,042               | 0,000                 | 0,000               | 0,024                      |
| Fructose Ø    | 1,803               | 1,175               | 0,437               | 0,000                 | 0,000               | 0,194                      |
| Fructose SD   | 0,026               | 0,022               | 0,057               | 0,000                 | 0,000               | 0,016                      |
| Glucose Ø     | 1,901               | 1,118               | 0,214               | 0,000                 | 0,000               | 0,114                      |
| Glucose SD    | 0,092               | 0,076               | 0,031               | 0,000                 | 0,000               | 0,002                      |
| Inulin Ø      |                     |                     |                     |                       |                     |                            |
| Inulin SD     |                     |                     |                     |                       |                     |                            |
| Lactose Ø     | 0,952               | 0,784               | 0,277               | 0,000                 | 0,000               | 0,414                      |
| Lactose SD    | 0,020               | 0,010               | 0,032               | 0,000                 | 0,000               | 0,008                      |
| Maltose Ø     | 1,947               | 1,145               | 0,343               | 0,000                 | 0,000               | 0,108                      |
| Maltose SD    | 0,060               | 0,017               | 0,020               | 0,000                 | 0,000               | 0,009                      |
| Mannose Ø     |                     |                     |                     |                       |                     |                            |
| Mannose SD    |                     |                     |                     |                       |                     |                            |
| Pectin Ø      | 0,132               | 0,113               | 0,000               | 0,000                 | 0,000               | 0,024                      |
| Pectin SD     | 0,008               | 0,092               | 0,000               | 0,000                 | 0,000               | 0,001                      |
| Starch Ø      | 2,026               | 1,355               | 0,401               | 0,000                 | 0,000               | 0,151                      |
| Starch SD     | 0,081               | 0,208               | 0,020               | 0,000                 | 0,000               | 0,018                      |
| Stroh Ø       | 0,871               | 0,910               | 0,143               | 0,000                 | 0,014               | 0,375                      |
| Stroh SD      | 0,010               | 0,061               | 0,007               | 0,000                 | 0,002               | 0,012                      |
| Sucrose Ø     | 2,227               | 1,388               | 0,234               | 0,000                 | 0,000               | 0,129                      |
| Sucrose SD    | 0,026               | 0,163               | 0,051               | 0,000                 | 0,000               | 0,017                      |
| Trehalose Ø   |                     |                     |                     |                       |                     |                            |
| Trehalose SD  |                     |                     |                     |                       |                     |                            |
| Xylan Ø       | 1,293               | 0,837               | 0,141               | 0,000                 | 0,068               | 0,216                      |
| Xylan SD      | 0,033               | 0,030               | 0,002               | 0,000                 | 0,001               | 0,012                      |
| Xylose Ø      | 1,581               | 0,948               | 0,644               | 0,000                 | 0,000               | 0,097                      |
| Xylose SD     | 0,089               | 0,046               | 0,067               | 0,000                 | 0,000               | 0,020                      |

Tab. S9: Relative produced metabolites from W212 while growing on different c-sources including standard deviation (SD) and excluding ethanol.

|               | Formate/total [%] | Acetate/total [%] | Lactate/total [%] | Succinate/total [%] | Citrate/total [%] | H2/total [%] |
|---------------|-------------------|-------------------|-------------------|---------------------|-------------------|--------------|
| Cellobiose Ø  | 52,414            | 33,027            | 8,696             | 0,000               | 0,000             | 5,864        |
| Cellobiose SD | 0,533             | 0,223             | 0,217             | 0,000               | 0,000             | 0,840        |
| Cellulose Ø   | 42,577            | 34,796            | 13,597            | 0,000               | 0,000             | 9,030        |
| Cellulose SD  | 0,712             | 0,569             | 0,975             | 0,000               | 0,000             | 0,620        |
| Fructose Ø    | 49,978            | 32,562            | 12,100            | 0,000               | 0,000             | 5,361        |
| Fructose SD   | 1,146             | 0,719             | 1,465             | 0,000               | 0,000             | 0,376        |
| Glucose Ø     | 56,810            | 33,384            | 6,377             | 0,000               | 0,000             | 3,428        |
| Glucose SD    | 0,745             | 0,356             | 0,659             | 0,000               | 0,000             | 0,195        |
| Inulin Ø      |                   |                   |                   |                     |                   |              |
| Inulin SD     |                   |                   |                   |                     |                   |              |
| Lactose Ø     | 39,211            | 32,302            | 11,409            | 0,000               | 0,000             | 17,078       |
| Lactose SD    | 0,404             | 0,829             | 1,161             | 0,000               | 0,000             | 0,516        |
| Maltose Ø     | 54,946            | 32,334            | 9,675             | 0,000               | 0,000             | 3,045        |
| Maltose SD    | 0,493             | 0,478             | 0,332             | 0,000               | 0,000             | 0,329        |
| Mannose Ø     |                   |                   |                   |                     |                   |              |
| Mannose SD    |                   |                   |                   |                     |                   |              |
| Pectin Ø      | 55,941            | 34,396            | 0,000             | 0,000               | 0,000             | 9,663        |
| Pectin SD     | 22,254            | 25,256            | 0,000             | 0,000               | 0,000             | 3,002        |
| Starch Ø      | 51,652            | 34,262            | 10,248            | 0,000               | 0,000             | 3,838        |
| Starch SD     | 1,993             | 2,783             | 0,836             | 0,000               | 0,000             | 0,249        |
| Stroh Ø       | 37,708            | 39,304            | 6,185             | 0,000               | 0,595             | 16,208       |
| Stroh SD      | 0,812             | 1,419             | 0,483             | 0,000               | 0,120             | 0,292        |
| Sucrose Ø     | 56,142            | 34,787            | 5,823             | 0,000               | 0,000             | 3,247        |
| Sucrose SD    | 2,879             | 2,041             | 1,003             | 0,000               | 0,000             | 0,340        |
| Trehalose Ø   |                   |                   |                   |                     |                   |              |
| Trehalose SD  |                   |                   |                   |                     |                   |              |
| Xylan Ø       | 50,585            | 32,748            | 5,524             | 0,000               | 2,679             | 8,464        |
| Xylan SD      | 0,686             | 0,961             | 0,161             | 0,000               | 0,018             | 0,565        |
| Xylose Ø      | 48,327            | 28,997            | 19,722            | 0,000               | 0,000             | 2,954        |
| Xylose SD     | 0,939             | 0,606             | 1,983             | 0,000               | 0,000             | 0,524        |

Tab. S10: Produced metabolites from SA222 while growing on different c-sources including standard deviation (SD) and excluding ethanol.

|                        | Formate $\Delta$<br>[mmol] | Acetate $\Delta$<br>[mmol] | Lactate $\Delta$<br>[mmol] | Succinate $\Delta$<br>[mmol] | Citrate $\Delta$<br>[mmol] | H2 $\Delta$<br>[mmol] |
|------------------------|----------------------------|----------------------------|----------------------------|------------------------------|----------------------------|-----------------------|
| Cellobiose $\emptyset$ | 1,537                      | 0,883                      | 0,820                      | 0,000                        | 0,000                      | 0,279                 |
| Cellobiose SD          | 0,074                      | 0,081                      | 0,078                      | 0,000                        | 0,000                      | 0,025                 |
| Cellulose $\emptyset$  | 0,620                      | 0,375                      | 0,000                      | 0,000                        | 0,000                      | 0,186                 |
| Cellulose SD           | 0,027                      | 0,063                      | 0,000                      | 0,000                        | 0,000                      | 0,022                 |
| Fructose $\emptyset$   | 1,534                      | 0,914                      | 0,577                      | 0,068                        | 0,000                      | 0,193                 |
| Fructose SD            | 0,002                      | 0,016                      | 0,041                      | 0,048                        | 0,000                      | 0,017                 |
| Glucose $\emptyset$    | 1,451                      | 0,858                      | 0,846                      | 0,031                        | 0,000                      | 0,213                 |
| Glucose SD             | 0,072                      | 0,035                      | 0,058                      | 0,044                        | 0,000                      | 0,027                 |
| Inulin $\emptyset$     |                            |                            |                            |                              |                            |                       |
| Inulin SD              |                            |                            |                            |                              |                            |                       |
| Lactose $\emptyset$    | 0,786                      | 0,589                      | 0,465                      | 0,000                        | 0,000                      | 0,328                 |
| Lactose SD             | 0,008                      | 0,014                      | 0,085                      | 0,000                        | 0,000                      | 0,013                 |
| Maltose $\emptyset$    | 1,469                      | 0,881                      | 0,722                      | 0,000                        | 0,000                      | 0,208                 |
| Maltose SD             | 0,040                      | 0,023                      | 0,028                      | 0,000                        | 0,000                      | 0,019                 |
| Mannose $\emptyset$    | 1,142                      | 0,729                      | 1,230                      | 0,000                        | 0,000                      | 0,238                 |
| Mannose SD             | 0,024                      | 0,024                      | 0,006                      | 0,000                        | 0,000                      | 0,011                 |
| Pectin $\emptyset$     | 0,199                      | 0,162                      | 0,000                      | 0,000                        | 0,005                      | 0,027                 |
| Pectin SD              | 0,023                      | 0,008                      | 0,000                      | 0,000                        | 0,005                      | 0,001                 |
| Starch $\emptyset$     | 1,510                      | 0,933                      | 0,772                      | 0,032                        | 0,000                      | 0,275                 |
| Starch SD              | 0,302                      | 0,183                      | 0,210                      | 0,045                        | 0,000                      | 0,017                 |
| Stroh $\emptyset$      | 0,735                      | 0,609                      | 0,058                      | 0,000                        | 0,003                      | 0,303                 |
| Stroh SD               | 0,002                      | 0,010                      | 0,006                      | 0,000                        | 0,005                      | 0,013                 |
| Sucrose $\emptyset$    | 1,463                      | 0,925                      | 1,025                      | 0,062                        | 0,000                      | 0,245                 |
| Sucrose SD             | 0,075                      | 0,051                      | 0,039                      | 0,044                        | 0,000                      | 0,009                 |
| Trehalose $\emptyset$  | 0,000                      | 0,000                      | 0,000                      | 0,000                        | 0,000                      | 0,005                 |
| Trehalose SD           | 0,000                      | 0,000                      | 0,000                      | 0,000                        | 0,000                      | 0,000                 |
| Xylan $\emptyset$      | 1,153                      | 0,765                      | 0,317                      | 0,038                        | 0,055                      | 0,212                 |
| Xylan SD               | 0,015                      | 0,005                      | 0,071                      | 0,053                        | 0,002                      | 0,007                 |
| Xylose $\emptyset$     | 1,367                      | 0,869                      | 0,860                      | 0,000                        | 0,000                      | 0,260                 |
| Xylose SD              | 0,049                      | 0,022                      | 0,106                      | 0,000                        | 0,000                      | 0,015                 |



Tab. S11: Relative produced metabolites from SA222 while growing on different c-sources including standard deviation (SD) and excluding ethanol.

|               | Formate/total [%] | Acetate/total [%] | Lactate/total [%] | Succinate/total [%] | Citrate/total [%] | H2/total [%] |
|---------------|-------------------|-------------------|-------------------|---------------------|-------------------|--------------|
| Cellobiose Ø  | 43,707            | 25,044            | 23,286            | 0,000               | 0,000             | 7,964        |
| Cellobiose SD | 0,606             | 0,898             | 1,371             | 0,000               | 0,000             | 0,798        |
| Cellulose Ø   | 52,734            | 31,573            | 0,000             | 0,000               | 0,000             | 15,693       |
| Cellulose SD  | 2,592             | 2,248             | 0,000             | 0,000               | 0,000             | 0,362        |
| Fructose Ø    | 46,704            | 27,819            | 17,557            | 2,041               | 0,000             | 5,879        |
| Fructose SD   | 1,262             | 0,523             | 1,117             | 1,448               | 0,000             | 0,395        |
| Glucose Ø     | 42,681            | 25,260            | 24,890            | 0,894               | 0,000             | 6,275        |
| Glucose SD    | 1,847             | 1,019             | 1,726             | 1,264               | 0,000             | 0,912        |
| Inulin Ø      |                   |                   |                   |                     |                   |              |
| Inulin SD     |                   |                   |                   |                     |                   |              |
| Lactose Ø     | 36,272            | 27,191            | 21,386            | 0,000               | 0,000             | 15,150       |
| Lactose SD    | 1,167             | 1,333             | 3,425             | 0,000               | 0,000             | 1,001        |
| Maltose Ø     | 44,801            | 26,860            | 22,006            | 0,000               | 0,000             | 6,333        |
| Maltose SD    | 0,839             | 0,186             | 0,566             | 0,000               | 0,000             | 0,477        |
| Mannose Ø     | 34,192            | 21,813            | 36,862            | 0,000               | 0,000             | 7,133        |
| Mannose SD    | 0,288             | 0,330             | 0,583             | 0,000               | 0,000             | 0,200        |
| Pectin Ø      | 50,517            | 41,331            | 0,000             | 0,000               | 1,210             | 6,942        |
| Pectin SD     | 2,429             | 2,416             | 0,000             | 0,000               | 1,308             | 0,442        |
| Starch Ø      | 42,854            | 26,495            | 21,741            | 0,709               | 0,000             | 8,200        |
| Starch SD     | 1,913             | 1,135             | 2,508             | 1,003               | 0,000             | 2,021        |
| Stroh Ø       | 43,009            | 35,659            | 3,396             | 0,000               | 0,192             | 17,744       |
| Stroh SD      | 0,551             | 0,175             | 0,330             | 0,000               | 0,271             | 0,638        |
| Sucrose Ø     | 39,288            | 24,845            | 27,587            | 1,688               | 0,000             | 6,591        |
| Sucrose SD    | 1,357             | 0,961             | 1,567             | 1,198               | 0,000             | 0,141        |
| Trehalose Ø   | 0,000             | 0,000             | 0,000             | 0,000               | 0,000             | 100,000      |
| Trehalose SD  | 0,000             | 0,000             | 0,000             | 0,000               | 0,000             | 0,000        |
| Xylan Ø       | 45,440            | 30,167            | 12,438            | 1,429               | 2,154             | 8,372        |
| Xylan SD      | 1,297             | 1,021             | 2,488             | 2,021               | 0,017             | 0,588        |
| Xylose Ø      | 40,767            | 25,908            | 25,575            | 0,000               | 0,000             | 7,750        |
| Xylose SD     | 1,723             | 0,881             | 2,679             | 0,000               | 0,000             | 0,257        |

Tab. S12: Produced metabolites from X2152 while growing on different c-sources including standard deviation (SD) and excluding ethanol.

|                        | Formate $\Delta$<br>[mmol] | Acetate $\Delta$<br>[mmol] | Lactate $\Delta$<br>[mmol] | Succinate $\Delta$<br>[mmol] | Citrate $\Delta$<br>[mmol] | H <sub>2</sub> $\Delta$<br>[mmol] |
|------------------------|----------------------------|----------------------------|----------------------------|------------------------------|----------------------------|-----------------------------------|
| Cellobiose $\emptyset$ | 1,971                      | 1,419                      | 0,000                      | 0,177                        | 0,000                      | 0,416                             |
| Cellobiose SD          | 0,038                      | 0,000                      | 0,000                      | 0,123                        | 0,000                      | 0,033                             |
| Cellulose $\emptyset$  | 1,562                      | 1,214                      | 0,000                      | 0,242                        | 0,000                      | 0,392                             |
| Cellulose SD           | 0,128                      | 0,070                      | 0,000                      | 0,045                        | 0,000                      | 0,020                             |
| Fructose $\emptyset$   | 1,937                      | 1,409                      | 0,000                      | 0,237                        | 0,000                      | 0,282                             |
| Fructose SD            | 0,211                      | 0,073                      | 0,000                      | 0,101                        | 0,000                      | 0,009                             |
| Glucose $\emptyset$    | 1,985                      | 1,381                      | 0,000                      | 0,324                        | 0,000                      | 0,236                             |
| Glucose SD             | 0,021                      | 0,091                      | 0,000                      | 0,015                        | 0,000                      | 0,019                             |
| Inulin $\emptyset$     |                            |                            |                            |                              |                            |                                   |
| Inulin SD              |                            |                            |                            |                              |                            |                                   |
| Lactose $\emptyset$    | 1,115                      | 0,824                      | 0,000                      | 0,098                        | 0,000                      | 0,366                             |
| Lactose SD             | 0,198                      | 0,149                      | 0,000                      | 0,070                        | 0,000                      | 0,026                             |
| Maltose $\emptyset$    | 0,000                      | 0,000                      | 0,000                      | 0,000                        | 0,000                      | 0,035                             |
| Maltose SD             | 0,000                      | 0,000                      | 0,000                      | 0,000                        | 0,000                      | 0,002                             |
| Mannose $\emptyset$    |                            |                            |                            |                              |                            |                                   |
| Mannose SD             |                            |                            |                            |                              |                            |                                   |
| Pectin $\emptyset$     | 0,086                      | 0,302                      | 0,000                      | 0,000                        | 0,000                      | 0,020                             |
| Pectin SD              | 0,061                      | 0,069                      | 0,000                      | 0,000                        | 0,000                      | 0,002                             |
| Starch $\emptyset$     | 0,000                      | 0,000                      | 0,000                      | 0,000                        | 0,000                      | 0,008                             |
| Starch SD              | 0,000                      | 0,000                      | 0,000                      | 0,000                        | 0,000                      | 0,001                             |
| Stroh $\emptyset$      | 0,919                      | 0,367                      | 0,000                      | 0,000                        | 0,011                      | 0,411                             |
| Stroh SD               | 0,056                      | 0,046                      | 0,000                      | 0,000                        | 0,000                      | 0,017                             |
| Sucrose $\emptyset$    | 0,169                      | 0,000                      | 0,027                      | 0,000                        | 0,000                      | 0,050                             |
| Sucrose SD             | 0,004                      | 0,000                      | 0,038                      | 0,000                        | 0,000                      | 0,001                             |
| Trehalose $\emptyset$  | 0,000                      | 0,000                      | 0,000                      | 0,000                        | 0,000                      | 0,006                             |
| Trehalose SD           | 0,000                      | 0,000                      | 0,000                      | 0,000                        | 0,000                      | 0,000                             |
| Xylan $\emptyset$      | 1,260                      | 0,969                      | 0,000                      | 0,217                        | 0,027                      | 0,309                             |
| Xylan SD               | 0,100                      | 0,116                      | 0,000                      | 0,012                        | 0,010                      | 0,007                             |
| Xylose $\emptyset$     | 1,714                      | 1,257                      | 0,000                      | 0,186                        | 0,000                      | 0,321                             |
| Xylose SD              | 0,090                      | 0,073                      | 0,000                      | 0,020                        | 0,000                      | 0,034                             |

Tab. S13: Relative produced metabolites from X2152 while growing on different c-sources including standard deviation (SD) and excluding ethanol.

|               | Formate/total [%] | Acetate/total [%] | Lactate/total [%] | Succinate/total [%] | Citrate/total [%] | H2/total [%] |
|---------------|-------------------|-------------------|-------------------|---------------------|-------------------|--------------|
| Cellobiose Ø  | 49,501            | 35,633            | 0,000             | 4,399               | 0,000             | 10,466       |
| Cellobiose SD | 1,610             | 0,463             | 0,000             | 3,040               | 0,000             | 0,968        |
| Cellulose Ø   | 45,748            | 35,649            | 0,000             | 7,103               | 0,000             | 11,500       |
| Cellulose SD  | 1,773             | 2,192             | 0,000             | 1,406               | 0,000             | 0,459        |
| Fructose Ø    | 50,048            | 36,663            | 0,000             | 5,926               | 0,000             | 7,363        |
| Fructose SD   | 1,187             | 2,529             | 0,000             | 2,197               | 0,000             | 0,726        |
| Glucose Ø     | 50,602            | 35,139            | 0,000             | 8,250               | 0,000             | 6,010        |
| Glucose SD    | 1,596             | 1,556             | 0,000             | 0,220               | 0,000             | 0,506        |
| Inulin Ø      |                   |                   |                   |                     |                   |              |
| Inulin SD     |                   |                   |                   |                     |                   |              |
| Lactose Ø     | 46,374            | 34,249            | 0,000             | 3,622               | 0,000             | 15,755       |
| Lactose SD    | 1,290             | 0,340             | 0,000             | 2,583               | 0,000             | 3,135        |
| Maltose Ø     | 0,000             | 0,000             | 0,000             | 0,000               | 0,000             | 100,000      |
| Maltose SD    | 0,000             | 0,000             | 0,000             | 0,000               | 0,000             | 0,000        |
| Mannose Ø     |                   |                   |                   |                     |                   |              |
| Mannose SD    |                   |                   |                   |                     |                   |              |
| Pectin Ø      | 20,767            | 74,228            | 0,000             | 0,000               | 0,000             | 5,005        |
| Pectin SD     | 15,261            | 15,541            | 0,000             | 0,000               | 0,000             | 1,028        |
| Starch Ø      | 0,000             | 0,000             | 0,000             | 0,000               | 0,000             | 100,000      |
| Starch SD     | 0,000             | 0,000             | 0,000             | 0,000               | 0,000             | 0,000        |
| Stroh Ø       | 53,787            | 21,401            | 0,000             | 0,000               | 0,643             | 24,169       |
| Stroh SD      | 0,226             | 1,582             | 0,000             | 0,000               | 0,033             | 1,780        |
| Sucrose Ø     | 70,336            | 0,000             | 8,678             | 0,000               | 0,000             | 20,986       |
| Sucrose SD    | 9,324             | 0,000             | 12,272            | 0,000               | 0,000             | 2,952        |
| Trehalose Ø   | 0,000             | 0,000             | 0,000             | 0,000               | 0,000             | 100,000      |
| Trehalose SD  | 0,000             | 0,000             | 0,000             | 0,000               | 0,000             | 0,000        |
| Xylan Ø       | 45,309            | 34,735            | 0,000             | 7,820               | 0,940             | 11,196       |
| Xylan SD      | 0,180             | 1,443             | 0,000             | 0,489               | 0,294             | 1,237        |
| Xylose Ø      | 49,297            | 36,159            | 0,000             | 5,347               | 0,000             | 9,197        |
| Xylose SD     | 0,664             | 0,141             | 0,000             | 0,360               | 0,000             | 0,483        |

Tab. S14: Produced metabolites from A252 while growing on different c-sources including standard deviation (SD) and excluding ethanol.

|               | Formate Δ<br>[mmol] | Acetate Δ<br>[mmol] | Lactate Δ<br>[mmol] | Succinate Δ<br>[mmol] | Citrate Δ<br>[mmol] | H2 Δ<br>[mmol] |
|---------------|---------------------|---------------------|---------------------|-----------------------|---------------------|----------------|
| Cellobiose Ø  | 1,717               | 1,308               | 0,590               | 0,216                 | 0,000               | 0,603          |
| Cellobiose SD | 0,044               | 0,054               | 0,057               | 0,023                 | 0,000               | 0,044          |
| Cellulose Ø   | 1,268               | 1,052               | 0,321               | 0,131                 | 0,000               | 0,466          |
| Cellulose SD  | 0,078               | 0,080               | 0,172               | 0,024                 | 0,000               | 0,036          |
| Fructose Ø    | 1,460               | 1,199               | 0,615               | 0,164                 | 0,000               | 0,430          |
| Fructose SD   | 0,082               | 0,077               | 0,034               | 0,023                 | 0,000               | 0,020          |
| Glucose Ø     | 1,559               | 1,211               | 0,576               | 0,194                 | 0,000               | 0,500          |
| Glucose SD    | 0,077               | 0,055               | 0,047               | 0,007                 | 0,000               | 0,010          |
| Inulin Ø      | 0,092               | 0,165               | 0,021               | 0,000                 | 0,000               | 0,037          |
| Inulin SD     | 0,130               | 0,234               | 0,030               | 0,000                 | 0,000               | 0,025          |
| Lactose Ø     | 1,434               | 1,307               | 0,317               | 0,152                 | 0,000               | 0,549          |
| Lactose SD    | 0,020               | 0,043               | 0,123               | 0,009                 | 0,000               | 0,024          |
| Maltose Ø     | 1,523               | 1,436               | 0,651               | 0,153                 | 0,000               | 0,438          |
| Maltose SD    | 0,025               | 0,176               | 0,014               | 0,007                 | 0,000               | 0,024          |
| Mannose Ø     | 1,362               | 1,157               | 0,508               | 0,148                 | 0,000               | 0,323          |
| Mannose SD    | 0,042               | 0,168               | 0,046               | 0,011                 | 0,000               | 0,047          |
| Pectin Ø      | 0,092               | 0,214               | 0,049               | 0,000                 | 0,069               | 0,020          |
| Pectin SD     | 0,066               | 0,185               | 0,035               | 0,000                 | 0,002               | 0,004          |
| Starch Ø      | 1,501               | 1,338               | 0,535               | 0,168                 | 0,000               | 0,491          |
| Starch SD     | 0,144               | 0,130               | 0,071               | 0,011                 | 0,000               | 0,065          |
| Stroh Ø       | 0,902               | 1,054               | 0,086               | 0,084                 | 0,013               | 0,543          |
| Stroh SD      | 0,008               | 0,063               | 0,016               | 0,008                 | 0,000               | 0,012          |
| Sucrose Ø     | 1,611               | 1,343               | 0,666               | 0,194                 | 0,000               | 0,494          |
| Sucrose SD    | 0,048               | 0,067               | 0,085               | 0,000                 | 0,000               | 0,039          |
| Trehalose Ø   | 0,000               | 0,000               | 0,000               | 0,000                 | 0,000               | 0,007          |
| Trehalose SD  | 0,000               | 0,000               | 0,000               | 0,000                 | 0,000               | 0,005          |
| Xylan Ø       | 1,325               | 0,982               | 0,298               | 0,124                 | 0,074               | 0,398          |
| Xylan SD      | 0,176               | 0,154               | 0,063               | 0,015                 | 0,015               | 0,011          |
| Xylose Ø      | 1,405               | 1,081               | 0,549               | 0,187                 | 0,000               | 0,442          |
| Xylose SD     | 0,153               | 0,136               | 0,079               | 0,019                 | 0,000               | 0,011          |

Tab. S15: Relative produced metabolites from A252 while growing on different c-sources including standard deviation (SD) and excluding ethanol.

|               | Formate/total [%] | Acetate/total [%] | Lactate/total [%] | Succinate/total [%] | Citrate/total [%] | H2/total [%] |
|---------------|-------------------|-------------------|-------------------|---------------------|-------------------|--------------|
| Cellobiose Ø  | 38,717            | 29,499            | 13,315            | 4,871               | 0,000             | 13,599       |
| Cellobiose SD | 0,424             | 0,908             | 1,453             | 0,582               | 0,000             | 0,779        |
| Cellulose Ø   | 39,318            | 32,561            | 9,489             | 4,008               | 0,000             | 14,624       |
| Cellulose SD  | 1,631             | 0,791             | 4,454             | 0,335               | 0,000             | 2,571        |
| Fructose Ø    | 37,725            | 30,991            | 15,899            | 4,221               | 0,000             | 11,164       |
| Fructose SD   | 0,342             | 0,899             | 0,571             | 0,441               | 0,000             | 1,011        |
| Glucose Ø     | 38,581            | 29,981            | 14,239            | 4,801               | 0,000             | 12,397       |
| Glucose SD    | 0,571             | 0,871             | 0,890             | 0,293               | 0,000             | 0,652        |
| Inulin Ø      | 10,128            | 18,220            | 2,330             | 0,000               | 0,000             | 69,322       |
| Inulin SD     | 14,324            | 25,767            | 3,295             | 0,000               | 0,000             | 43,386       |
| Lactose Ø     | 38,209            | 34,785            | 8,324             | 4,037               | 0,000             | 14,646       |
| Lactose SD    | 1,377             | 0,455             | 2,886             | 0,190               | 0,000             | 1,151        |
| Maltose Ø     | 36,309            | 34,061            | 15,549            | 3,668               | 0,000             | 10,412       |
| Maltose SD    | 1,478             | 2,686             | 1,012             | 0,320               | 0,000             | 0,137        |
| Mannose Ø     | 39,075            | 32,927            | 14,505            | 4,281               | 0,000             | 9,210        |
| Mannose SD    | 1,998             | 2,733             | 0,566             | 0,614               | 0,000             | 0,760        |
| Pectin Ø      | 29,110            | 38,030            | 9,245             | 0,000               | 18,005            | 5,609        |
| Pectin SD     | 24,858            | 30,234            | 6,750             | 0,000               | 7,740             | 3,403        |
| Starch Ø      | 37,187            | 33,251            | 13,251            | 4,179               | 0,000             | 12,132       |
| Starch SD     | 1,079             | 3,000             | 1,197             | 0,395               | 0,000             | 0,674        |
| Stroh Ø       | 33,649            | 39,274            | 3,198             | 3,129               | 0,480             | 20,271       |
| Stroh SD      | 0,864             | 1,195             | 0,604             | 0,216               | 0,024             | 0,565        |
| Sucrose Ø     | 37,420            | 31,154            | 15,430            | 4,510               | 0,000             | 11,486       |
| Sucrose SD    | 1,162             | 0,728             | 1,665             | 0,136               | 0,000             | 1,155        |
| Trehalose Ø   | 0,000             | 0,000             | 0,000             | 0,000               | 0,000             | 100,000      |
| Trehalose SD  | 0,000             | 0,000             | 0,000             | 0,000               | 0,000             | 0,000        |
| Xylan Ø       | 41,392            | 30,587            | 9,218             | 3,880               | 2,284             | 12,639       |
| Xylan SD      | 0,689             | 0,885             | 0,766             | 0,166               | 0,163             | 1,665        |
| Xylose Ø      | 38,338            | 29,441            | 14,927            | 5,112               | 0,000             | 12,183       |
| Xylose SD     | 0,047             | 0,598             | 0,643             | 0,087               | 0,000             | 1,096        |
