# Supplementary material for: Isolation and Biochemical Characterization of Six Anaerobic Fungal Strains from Zoo Animal Feces
Source: Microorganisms. 2021 Aug 3;9(8):1655. doi: 10.3390/microorganisms9081655 (PMC8399178; doi:10.3390/microorganisms9081655)
Supplement: Supplementary file 1 [file microorganisms-09-01655-s001.zip]

Archive with 5 entries (5 files):
- Figure S1.png
- Supplementary captions.pdf
- Table S1.xlsx
- Table S2.xlsx
- Tables S3-S13.pdf
