# Supplementary material for: Isolation and Biochemical Characterization of Six Anaerobic Fungal Strains from Zoo Animal Feces
Source: Microorganisms. 2021 Aug 3;9(8):1655. doi: 10.3390/microorganisms9081655 (PMC8399178; doi:10.3390/microorganisms9081655)
Supplement: Supplementary file 1 [file microorganisms-09-01655-s001.zip › Table S1.xlsx]

## Sheet: Tabelle1
Seq->	AJ864475_Orpinomyces_sp._OUS1	JN939160_Orpinomyces_sp._KF1	JN939166_Orpinomyces_sp._KF5	MT085733_Orpinomyces_joyonii_isolate_D3A	JN939160_Orpinomyces_sp._KF6	JN939164_Orpinomyces_sp._ZU1	HQ703476_Orpinomyces_joyonii_isolate_SDP1	HQ703479_Orpinomyces_joyonii_SDP4	HQ703480_Orpinomyces_joyonii_SDP5	JN939161_Orpinomyces_sp._KF3	JN939162_Orpinomyces_sp._KF2	HQ703477_Orpinomyces_joyonii_SDP2	HQ703478_Orpinomyces_joyonii_SDP3	HQ703481_Orpinomyces_joyonii_SDP6	KM878680_Orpinomyces_sp._KF11	JQ782552_Orpinomyces_sp._OYR1	JQ782553_Orpinomyces_sp._OYR2	JQ782551_Orpinomyces_sp._OYF	HQ703471_Orpinomyces_intercalaris_isolate_SKP1	HQ703473_Orpinomyces_intercalaris_SKP2	HQ703474_Orpinomyces_intercalaris_isolate_SKP4	HQ703475_Orpinomyces_intercalaris_SKP5	HQ703473_Orpinomyces_intercalaris_SKP3	HQ263327_Orpinomyces_sp._C_SSD-2011_strain_NDRI3	HQ263330_Orpinomyces_sp._F_SSD-2011_strain_NDRI6	MW175314_Isolate_W212_Clone_6	MW175312_Isolate_W212_Clone_3	MW175316_Isolate_W212_Clone_13	MW175318_Isolate_W212_Clone_15	MW175313_Isolate_W212_Clone_5	MW175315_Isolate_W212_Clone_12	MW175317_Isolate_W212_Clone_14	MK881965_Ghazallomyces_constrictus_strain_ADC2	MK881966_Ghazallomyces_constrictus_strain_ADS14	MK881967_Ghazallomyces_constrictus_strain_AXS33	MK881968_Ghazallomyces_constrictus_strain_AXS34	MK881970_Ghazallomyces_constrictus_strain_AXS32	MK881971_Ghazallomyces_constrictus_strain_AXS31	MK881969_Ghazallomyces_constrictus_strain_ADS12	MK881973_Ghazallomyces_constrictus_strain_ADS21	HQ263331_Orpinomyces_sp._A_SSD-2011_strain_NDRI7	KX961616_Pecoramyces_ruminantium_S4E	KX961617_Pecoramyces_ruminantium_S4F	KX961618_Pecoramyces_ruminantium_S4B	NG060094_Pecoramyces_ruminantium_C1A	MW175305_Isolate_SA222_Clone_1	MW175307_Isolate_SA222_Clone_3	MW175308_Isolate_SA222_Clone_4	MW175309_Isolate_SA222_Clone_5
AJ864475_Orpinomyces_sp._OUS1	ID	1	1	1	1	0.998	0.998	0.996	0.996	0.996	0.996	0.995	0.995	0.996	0.993	0.993	0.987	0.989	0.984	0.987	0.987	0.984	0.98	0.978	0.983	0.993	0.992	0.993	0.992	0.993	0.993	0.993	0.975	0.975	0.975	0.975	0.975	0.972	0.973	0.969	0.972	0.96	0.96	0.96	0.963	0.958	0.958	0.96	0.957
JN939160_Orpinomyces_sp._KF1	1	ID	1	1	1	0.998	0.998	0.996	0.996	0.996	0.996	0.995	0.995	0.996	0.993	0.993	0.987	0.989	0.984	0.987	0.987	0.984	0.98	0.978	0.983	0.993	0.992	0.993	0.992	0.993	0.993	0.993	0.975	0.975	0.975	0.975	0.975	0.972	0.973	0.969	0.972	0.96	0.96	0.96	0.963	0.958	0.958	0.96	0.957
JN939166_Orpinomyces_sp._KF5	1	1	ID	1	1	0.998	0.998	0.996	0.996	0.996	0.996	0.995	0.995	0.996	0.993	0.993	0.987	0.989	0.984	0.987	0.987	0.984	0.98	0.978	0.983	0.993	0.992	0.993	0.992	0.993	0.993	0.993	0.975	0.975	0.975	0.975	0.975	0.972	0.973	0.969	0.972	0.96	0.96	0.96	0.963	0.958	0.958	0.96	0.957
MT085733_Orpinomyces_joyonii_isolate_D3A	1	1	1	ID	1	0.998	0.998	0.996	0.996	0.996	0.996	0.995	0.995	0.996	0.993	0.993	0.987	0.989	0.984	0.987	0.987	0.984	0.98	0.978	0.983	0.993	0.992	0.993	0.992	0.993	0.993	0.993	0.975	0.975	0.975	0.975	0.975	0.972	0.973	0.969	0.972	0.96	0.96	0.96	0.963	0.958	0.958	0.96	0.957
JN939160_Orpinomyces_sp._KF6	1	1	1	1	ID	0.998	0.998	0.996	0.996	0.996	0.996	0.995	0.995	0.996	0.993	0.993	0.987	0.989	0.984	0.987	0.987	0.984	0.98	0.978	0.983	0.993	0.992	0.993	0.992	0.993	0.993	0.993	0.975	0.975	0.975	0.975	0.975	0.972	0.973	0.969	0.972	0.96	0.96	0.96	0.963	0.958	0.958	0.96	0.957
JN939164_Orpinomyces_sp._ZU1	0.998	0.998	0.998	0.998	0.998	ID	1	0.998	0.998	0.998	0.998	0.996	0.996	0.998	0.995	0.995	0.989	0.99	0.986	0.986	0.986	0.986	0.978	0.98	0.984	0.995	0.993	0.995	0.993	0.995	0.995	0.995	0.976	0.976	0.976	0.976	0.976	0.973	0.975	0.97	0.973	0.961	0.961	0.961	0.964	0.96	0.96	0.961	0.958
HQ703476_Orpinomyces_joyonii_isolate_SDP1	0.998	0.998	0.998	0.998	0.998	1	ID	0.998	0.998	0.998	0.998	0.996	0.996	0.998	0.995	0.995	0.989	0.99	0.986	0.986	0.986	0.986	0.978	0.98	0.984	0.995	0.993	0.995	0.993	0.995	0.995	0.995	0.976	0.976	0.976	0.976	0.976	0.973	0.975	0.97	0.973	0.961	0.961	0.961	0.964	0.96	0.96	0.961	0.958
HQ703479_Orpinomyces_joyonii_SDP4	0.996	0.996	0.996	0.996	0.996	0.998	0.998	ID	1	0.996	0.996	0.998	0.998	1	0.993	0.993	0.987	0.992	0.984	0.984	0.984	0.987	0.98	0.978	0.983	0.993	0.992	0.993	0.992	0.993	0.993	0.993	0.975	0.975	0.975	0.975	0.975	0.972	0.973	0.969	0.972	0.96	0.96	0.96	0.963	0.958	0.958	0.96	0.957
HQ703480_Orpinomyces_joyonii_SDP5	0.996	0.996	0.996	0.996	0.996	0.998	0.998	1	ID	0.996	0.996	0.998	0.998	1	0.993	0.993	0.987	0.992	0.984	0.984	0.984	0.987	0.98	0.978	0.983	0.993	0.992	0.993	0.992	0.993	0.993	0.993	0.975	0.975	0.975	0.975	0.975	0.972	0.973	0.969	0.972	0.96	0.96	0.96	0.963	0.958	0.958	0.96	0.957
JN939161_Orpinomyces_sp._KF3	0.996	0.996	0.996	0.996	0.996	0.998	0.998	0.996	0.996	ID	1	0.998	0.998	0.996	0.996	0.996	0.99	0.992	0.984	0.984	0.984	0.984	0.976	0.981	0.986	0.996	0.995	0.996	0.995	0.996	0.996	0.996	0.978	0.978	0.978	0.978	0.978	0.975	0.976	0.972	0.975	0.963	0.963	0.963	0.966	0.961	0.961	0.963	0.96
JN939162_Orpinomyces_sp._KF2	0.996	0.996	0.996	0.996	0.996	0.998	0.998	0.996	0.996	1	ID	0.998	0.998	0.996	0.996	0.996	0.99	0.992	0.984	0.984	0.984	0.984	0.976	0.981	0.986	0.996	0.995	0.996	0.995	0.996	0.996	0.996	0.978	0.978	0.978	0.978	0.978	0.975	0.976	0.972	0.975	0.963	0.963	0.963	0.966	0.961	0.961	0.963	0.96
HQ703477_Orpinomyces_joyonii_SDP2	0.995	0.995	0.995	0.995	0.995	0.996	0.996	0.998	0.998	0.998	0.998	ID	1	0.998	0.995	0.995	0.989	0.993	0.983	0.983	0.983	0.986	0.978	0.98	0.984	0.995	0.993	0.995	0.993	0.995	0.995	0.995	0.976	0.976	0.976	0.976	0.976	0.973	0.975	0.97	0.973	0.961	0.961	0.961	0.964	0.96	0.96	0.961	0.958
HQ703478_Orpinomyces_joyonii_SDP3	0.995	0.995	0.995	0.995	0.995	0.996	0.996	0.998	0.998	0.998	0.998	1	ID	0.998	0.995	0.995	0.989	0.993	0.983	0.983	0.983	0.986	0.978	0.98	0.984	0.995	0.993	0.995	0.993	0.995	0.995	0.995	0.976	0.976	0.976	0.976	0.976	0.973	0.975	0.97	0.973	0.961	0.961	0.961	0.964	0.96	0.96	0.961	0.958
HQ703481_Orpinomyces_joyonii_SDP6	0.996	0.996	0.996	0.996	0.996	0.998	0.998	1	1	0.996	0.996	0.998	0.998	ID	0.993	0.993	0.987	0.992	0.984	0.984	0.984	0.987	0.98	0.978	0.983	0.993	0.992	0.993	0.992	0.993	0.993	0.993	0.975	0.975	0.975	0.975	0.975	0.972	0.973	0.969	0.972	0.96	0.96	0.96	0.963	0.958	0.958	0.96	0.957
KM878680_Orpinomyces_sp._KF11	0.993	0.993	0.993	0.993	0.993	0.995	0.995	0.993	0.993	0.996	0.996	0.995	0.995	0.993	ID	0.993	0.987	0.989	0.981	0.981	0.981	0.981	0.973	0.978	0.983	0.993	0.992	0.993	0.992	0.993	0.993	0.993	0.975	0.975	0.975	0.975	0.975	0.972	0.973	0.969	0.972	0.96	0.96	0.96	0.963	0.958	0.958	0.96	0.957
JQ782552_Orpinomyces_sp._OYR1	0.993	0.993	0.993	0.993	0.993	0.995	0.995	0.993	0.993	0.996	0.996	0.995	0.995	0.993	0.993	ID	0.993	0.992	0.984	0.984	0.984	0.984	0.976	0.981	0.986	0.996	0.995	0.996	0.995	0.996	0.996	0.996	0.978	0.978	0.978	0.978	0.978	0.975	0.976	0.972	0.975	0.963	0.963	0.963	0.966	0.961	0.961	0.963	0.96
JQ782553_Orpinomyces_sp._OYR2	0.987	0.987	0.987	0.987	0.987	0.989	0.989	0.987	0.987	0.99	0.99	0.989	0.989	0.987	0.987	0.993	ID	0.986	0.978	0.978	0.978	0.978	0.97	0.975	0.98	0.993	0.992	0.993	0.992	0.993	0.993	0.993	0.975	0.975	0.975	0.975	0.975	0.972	0.973	0.969	0.969	0.958	0.958	0.958	0.961	0.957	0.956	0.958	0.955
JQ782551_Orpinomyces_sp._OYF	0.989	0.989	0.989	0.989	0.989	0.99	0.99	0.992	0.992	0.992	0.992	0.993	0.993	0.992	0.989	0.992	0.986	ID	0.983	0.983	0.983	0.986	0.978	0.98	0.984	0.992	0.99	0.992	0.99	0.992	0.992	0.992	0.973	0.973	0.973	0.973	0.973	0.97	0.972	0.967	0.973	0.961	0.961	0.961	0.964	0.96	0.96	0.961	0.958
HQ703471_Orpinomyces_intercalaris_isolate_SKP1	0.984	0.984	0.984	0.984	0.984	0.986	0.986	0.984	0.984	0.984	0.984	0.983	0.983	0.984	0.981	0.984	0.978	0.983	ID	0.996	0.996	0.996	0.989	0.987	0.992	0.984	0.983	0.984	0.983	0.984	0.984	0.984	0.975	0.975	0.975	0.975	0.975	0.972	0.973	0.969	0.981	0.963	0.963	0.963	0.966	0.961	0.961	0.963	0.96
HQ703473_Orpinomyces_intercalaris_SKP2	0.987	0.987	0.987	0.987	0.987	0.986	0.986	0.984	0.984	0.984	0.984	0.983	0.983	0.984	0.981	0.984	0.978	0.983	0.996	ID	1	0.996	0.992	0.987	0.992	0.984	0.983	0.984	0.983	0.984	0.984	0.984	0.975	0.975	0.975	0.975	0.975	0.972	0.973	0.969	0.981	0.963	0.963	0.963	0.966	0.961	0.961	0.963	0.96
HQ703474_Orpinomyces_intercalaris_isolate_SKP4	0.987	0.987	0.987	0.987	0.987	0.986	0.986	0.984	0.984	0.984	0.984	0.983	0.983	0.984	0.981	0.984	0.978	0.983	0.996	1	ID	0.996	0.992	0.987	0.992	0.984	0.983	0.984	0.983	0.984	0.984	0.984	0.975	0.975	0.975	0.975	0.975	0.972	0.973	0.969	0.981	0.963	0.963	0.963	0.966	0.961	0.961	0.963	0.96
HQ703475_Orpinomyces_intercalaris_SKP5	0.984	0.984	0.984	0.984	0.984	0.986	0.986	0.987	0.987	0.984	0.984	0.986	0.986	0.987	0.981	0.984	0.978	0.986	0.996	0.996	0.996	ID	0.992	0.987	0.992	0.984	0.983	0.984	0.983	0.984	0.984	0.984	0.975	0.975	0.975	0.975	0.975	0.972	0.973	0.969	0.981	0.963	0.963	0.963	0.966	0.961	0.961	0.963	0.96
HQ703473_Orpinomyces_intercalaris_SKP3	0.98	0.98	0.98	0.98	0.98	0.978	0.978	0.98	0.98	0.976	0.976	0.978	0.978	0.98	0.973	0.976	0.97	0.978	0.989	0.992	0.992	0.992	ID	0.986	0.987	0.976	0.975	0.976	0.975	0.976	0.976	0.976	0.967	0.967	0.967	0.967	0.967	0.964	0.966	0.964	0.98	0.958	0.958	0.958	0.961	0.957	0.956	0.958	0.955
HQ263327_Orpinomyces_sp._C_SSD-2011_strain_NDRI3	0.978	0.978	0.978	0.978	0.978	0.98	0.98	0.978	0.978	0.981	0.981	0.98	0.98	0.978	0.978	0.981	0.975	0.98	0.987	0.987	0.987	0.987	0.986	ID	0.992	0.981	0.98	0.981	0.98	0.981	0.981	0.981	0.972	0.972	0.972	0.972	0.972	0.969	0.97	0.969	0.99	0.963	0.963	0.963	0.966	0.961	0.961	0.963	0.96
HQ263330_Orpinomyces_sp._F_SSD-2011_strain_NDRI6	0.983	0.983	0.983	0.983	0.983	0.984	0.984	0.983	0.983	0.986	0.986	0.984	0.984	0.983	0.983	0.986	0.98	0.984	0.992	0.992	0.992	0.992	0.987	0.992	ID	0.986	0.984	0.986	0.984	0.986	0.986	0.986	0.976	0.976	0.976	0.976	0.976	0.973	0.975	0.97	0.989	0.964	0.964	0.964	0.967	0.963	0.963	0.964	0.961
MW175314_Isolate_W212_Clone_6	0.993	0.993	0.993	0.993	0.993	0.995	0.995	0.993	0.993	0.996	0.996	0.995	0.995	0.993	0.993	0.996	0.993	0.992	0.984	0.984	0.984	0.984	0.976	0.981	0.986	ID	0.998	1	0.998	1	1	1	0.981	0.981	0.981	0.981	0.981	0.978	0.98	0.975	0.975	0.963	0.963	0.963	0.966	0.961	0.961	0.963	0.96
MW175312_Isolate_W212_Clone_3	0.992	0.992	0.992	0.992	0.992	0.993	0.993	0.992	0.992	0.995	0.995	0.993	0.993	0.992	0.992	0.995	0.992	0.99	0.983	0.983	0.983	0.983	0.975	0.98	0.984	0.998	ID	0.998	0.996	0.998	0.998	0.998	0.98	0.98	0.98	0.98	0.98	0.976	0.978	0.973	0.973	0.961	0.961	0.961	0.964	0.96	0.96	0.961	0.958
MW175316_Isolate_W212_Clone_13	0.993	0.993	0.993	0.993	0.993	0.995	0.995	0.993	0.993	0.996	0.996	0.995	0.995	0.993	0.993	0.996	0.993	0.992	0.984	0.984	0.984	0.984	0.976	0.981	0.986	1	0.998	ID	0.998	1	1	1	0.981	0.981	0.981	0.981	0.981	0.978	0.98	0.975	0.975	0.963	0.963	0.963	0.966	0.961	0.961	0.963	0.96
MW175318_Isolate_W212_Clone_15	0.992	0.992	0.992	0.992	0.992	0.993	0.993	0.992	0.992	0.995	0.995	0.993	0.993	0.992	0.992	0.995	0.992	0.99	0.983	0.983	0.983	0.983	0.975	0.98	0.984	0.998	0.996	0.998	ID	0.998	0.998	0.998	0.98	0.98	0.98	0.98	0.98	0.976	0.978	0.973	0.973	0.961	0.961	0.961	0.964	0.96	0.96	0.961	0.958
MW175313_Isolate_W212_Clone_5	0.993	0.993	0.993	0.993	0.993	0.995	0.995	0.993	0.993	0.996	0.996	0.995	0.995	0.993	0.993	0.996	0.993	0.992	0.984	0.984	0.984	0.984	0.976	0.981	0.986	1	0.998	1	0.998	ID	1	1	0.981	0.981	0.981	0.981	0.981	0.978	0.98	0.975	0.975	0.963	0.963	0.963	0.966	0.961	0.961	0.963	0.96
MW175315_Isolate_W212_Clone_12	0.993	0.993	0.993	0.993	0.993	0.995	0.995	0.993	0.993	0.996	0.996	0.995	0.995	0.993	0.993	0.996	0.993	0.992	0.984	0.984	0.984	0.984	0.976	0.981	0.986	1	0.998	1	0.998	1	ID	1	0.981	0.981	0.981	0.981	0.981	0.978	0.98	0.975	0.975	0.963	0.963	0.963	0.966	0.961	0.961	0.963	0.96
MW175317_Isolate_W212_Clone_14	0.993	0.993	0.993	0.993	0.993	0.995	0.995	0.993	0.993	0.996	0.996	0.995	0.995	0.993	0.993	0.996	0.993	0.992	0.984	0.984	0.984	0.984	0.976	0.981	0.986	1	0.998	1	0.998	1	1	ID	0.981	0.981	0.981	0.981	0.981	0.978	0.98	0.975	0.975	0.963	0.963	0.963	0.966	0.961	0.961	0.963	0.96
MK881965_Ghazallomyces_constrictus_strain_ADC2	0.975	0.975	0.975	0.975	0.975	0.976	0.976	0.975	0.975	0.978	0.978	0.976	0.976	0.975	0.975	0.978	0.975	0.973	0.975	0.975	0.975	0.975	0.967	0.972	0.976	0.981	0.98	0.981	0.98	0.981	0.981	0.981	ID	1	1	1	1	0.996	0.998	0.993	0.966	0.966	0.966	0.966	0.966	0.964	0.964	0.966	0.963
MK881966_Ghazallomyces_constrictus_strain_ADS14	0.975	0.975	0.975	0.975	0.975	0.976	0.976	0.975	0.975	0.978	0.978	0.976	0.976	0.975	0.975	0.978	0.975	0.973	0.975	0.975	0.975	0.975	0.967	0.972	0.976	0.981	0.98	0.981	0.98	0.981	0.981	0.981	1	ID	1	1	1	0.996	0.998	0.993	0.966	0.966	0.966	0.966	0.966	0.964	0.964	0.966	0.963
MK881967_Ghazallomyces_constrictus_strain_AXS33	0.975	0.975	0.975	0.975	0.975	0.976	0.976	0.975	0.975	0.978	0.978	0.976	0.976	0.975	0.975	0.978	0.975	0.973	0.975	0.975	0.975	0.975	0.967	0.972	0.976	0.981	0.98	0.981	0.98	0.981	0.981	0.981	1	1	ID	1	1	0.996	0.998	0.993	0.966	0.966	0.966	0.966	0.966	0.964	0.964	0.966	0.963
MK881968_Ghazallomyces_constrictus_strain_AXS34	0.975	0.975	0.975	0.975	0.975	0.976	0.976	0.975	0.975	0.978	0.978	0.976	0.976	0.975	0.975	0.978	0.975	0.973	0.975	0.975	0.975	0.975	0.967	0.972	0.976	0.981	0.98	0.981	0.98	0.981	0.981	0.981	1	1	1	ID	1	0.996	0.998	0.993	0.966	0.966	0.966	0.966	0.966	0.964	0.964	0.966	0.963
MK881970_Ghazallomyces_constrictus_strain_AXS32	0.975	0.975	0.975	0.975	0.975	0.976	0.976	0.975	0.975	0.978	0.978	0.976	0.976	0.975	0.975	0.978	0.975	0.973	0.975	0.975	0.975	0.975	0.967	0.972	0.976	0.981	0.98	0.981	0.98	0.981	0.981	0.981	1	1	1	1	ID	0.996	0.998	0.993	0.966	0.966	0.966	0.966	0.966	0.964	0.964	0.966	0.963
MK881971_Ghazallomyces_constrictus_strain_AXS31	0.972	0.972	0.972	0.972	0.972	0.973	0.973	0.972	0.972	0.975	0.975	0.973	0.973	0.972	0.972	0.975	0.972	0.97	0.972	0.972	0.972	0.972	0.964	0.969	0.973	0.978	0.976	0.978	0.976	0.978	0.978	0.978	0.996	0.996	0.996	0.996	0.996	ID	0.995	0.993	0.963	0.963	0.963	0.963	0.963	0.961	0.961	0.963	0.96
MK881969_Ghazallomyces_constrictus_strain_ADS12	0.973	0.973	0.973	0.973	0.973	0.975	0.975	0.973	0.973	0.976	0.976	0.975	0.975	0.973	0.973	0.976	0.973	0.972	0.973	0.973	0.973	0.973	0.966	0.97	0.975	0.98	0.978	0.98	0.978	0.98	0.98	0.98	0.998	0.998	0.998	0.998	0.998	0.995	ID	0.995	0.964	0.964	0.964	0.964	0.964	0.963	0.963	0.964	0.961
MK881973_Ghazallomyces_constrictus_strain_ADS21	0.969	0.969	0.969	0.969	0.969	0.97	0.97	0.969	0.969	0.972	0.972	0.97	0.97	0.969	0.969	0.972	0.969	0.967	0.969	0.969	0.969	0.969	0.964	0.969	0.97	0.975	0.973	0.975	0.973	0.975	0.975	0.975	0.993	0.993	0.993	0.993	0.993	0.993	0.995	ID	0.963	0.96	0.96	0.96	0.96	0.958	0.958	0.96	0.957
HQ263331_Orpinomyces_sp._A_SSD-2011_strain_NDRI7	0.972	0.972	0.972	0.972	0.972	0.973	0.973	0.972	0.972	0.975	0.975	0.973	0.973	0.972	0.972	0.975	0.969	0.973	0.981	0.981	0.981	0.981	0.98	0.99	0.989	0.975	0.973	0.975	0.973	0.975	0.975	0.975	0.966	0.966	0.966	0.966	0.966	0.963	0.964	0.963	ID	0.957	0.957	0.957	0.96	0.955	0.955	0.957	0.954
KX961616_Pecoramyces_ruminantium_S4E	0.96	0.96	0.96	0.96	0.96	0.961	0.961	0.96	0.96	0.963	0.963	0.961	0.961	0.96	0.96	0.963	0.958	0.961	0.963	0.963	0.963	0.963	0.958	0.963	0.964	0.963	0.961	0.963	0.961	0.963	0.963	0.963	0.966	0.966	0.966	0.966	0.966	0.963	0.964	0.96	0.957	ID	1	1	0.996	0.998	0.995	1	0.993
KX961617_Pecoramyces_ruminantium_S4F	0.96	0.96	0.96	0.96	0.96	0.961	0.961	0.96	0.96	0.963	0.963	0.961	0.961	0.96	0.96	0.963	0.958	0.961	0.963	0.963	0.963	0.963	0.958	0.963	0.964	0.963	0.961	0.963	0.961	0.963	0.963	0.963	0.966	0.966	0.966	0.966	0.966	0.963	0.964	0.96	0.957	1	ID	1	0.996	0.998	0.995	1	0.993
KX961618_Pecoramyces_ruminantium_S4B	0.96	0.96	0.96	0.96	0.96	0.961	0.961	0.96	0.96	0.963	0.963	0.961	0.961	0.96	0.96	0.963	0.958	0.961	0.963	0.963	0.963	0.963	0.958	0.963	0.964	0.963	0.961	0.963	0.961	0.963	0.963	0.963	0.966	0.966	0.966	0.966	0.966	0.963	0.964	0.96	0.957	1	1	ID	0.996	0.998	0.995	1	0.993
NG060094_Pecoramyces_ruminantium_C1A	0.963	0.963	0.963	0.963	0.963	0.964	0.964	0.963	0.963	0.966	0.966	0.964	0.964	0.963	0.963	0.966	0.961	0.964	0.966	0.966	0.966	0.966	0.961	0.966	0.967	0.966	0.964	0.966	0.964	0.966	0.966	0.966	0.966	0.966	0.966	0.966	0.966	0.963	0.964	0.96	0.96	0.996	0.996	0.996	ID	0.995	0.995	0.996	0.993
MW175305_Isolate_SA222_Clone_1	0.958	0.958	0.958	0.958	0.958	0.96	0.96	0.958	0.958	0.961	0.961	0.96	0.96	0.958	0.958	0.961	0.957	0.96	0.961	0.961	0.961	0.961	0.957	0.961	0.963	0.961	0.96	0.961	0.96	0.961	0.961	0.961	0.964	0.964	0.964	0.964	0.964	0.961	0.963	0.958	0.955	0.998	0.998	0.998	0.995	ID	0.993	0.998	0.992
MW175307_Isolate_SA222_Clone_3	0.958	0.958	0.958	0.958	0.958	0.96	0.96	0.958	0.958	0.961	0.961	0.96	0.96	0.958	0.958	0.961	0.956	0.96	0.961	0.961	0.961	0.961	0.956	0.961	0.963	0.961	0.96	0.961	0.96	0.961	0.961	0.961	0.964	0.964	0.964	0.964	0.964	0.961	0.963	0.958	0.955	0.995	0.995	0.995	0.995	0.993	ID	0.995	0.995
MW175308_Isolate_SA222_Clone_4	0.96	0.96	0.96	0.96	0.96	0.961	0.961	0.96	0.96	0.963	0.963	0.961	0.961	0.96	0.96	0.963	0.958	0.961	0.963	0.963	0.963	0.963	0.958	0.963	0.964	0.963	0.961	0.963	0.961	0.963	0.963	0.963	0.966	0.966	0.966	0.966	0.966	0.963	0.964	0.96	0.957	1	1	1	0.996	0.998	0.995	ID	0.993
MW175309_Isolate_SA222_Clone_5	0.957	0.957	0.957	0.957	0.957	0.958	0.958	0.957	0.957	0.96	0.96	0.958	0.958	0.957	0.957	0.96	0.955	0.958	0.96	0.96	0.96	0.96	0.955	0.96	0.961	0.96	0.958	0.96	0.958	0.96	0.96	0.96	0.963	0.963	0.963	0.963	0.963	0.96	0.961	0.957	0.954	0.993	0.993	0.993	0.993	0.992	0.995	0.993	ID
MW175310_Isolate_SA222_Clone_10	0.958	0.958	0.958	0.958	0.958	0.96	0.96	0.958	0.958	0.961	0.961	0.96	0.96	0.958	0.958	0.961	0.956	0.96	0.961	0.961	0.961	0.961	0.956	0.961	0.963	0.961	0.96	0.961	0.96	0.961	0.961	0.961	0.964	0.964	0.964	0.964	0.964	0.961	0.963	0.958	0.955	0.995	0.995	0.995	0.995	0.993	0.996	0.995	0.995
MW175311_Isolate_SA222_Clone_12	0.943	0.943	0.943	0.943	0.943	0.945	0.945	0.943	0.943	0.946	0.946	0.945	0.945	0.943	0.943	0.946	0.941	0.945	0.946	0.946	0.946	0.946	0.941	0.946	0.948	0.946	0.945	0.946	0.945	0.946	0.946	0.946	0.948	0.948	0.948	0.948	0.948	0.945	0.946	0.941	0.94	0.978	0.978	0.978	0.978	0.977	0.98	0.978	0.978
MW175306_Isolate_SA222_Clone_2	0.941	0.941	0.941	0.941	0.941	0.943	0.943	0.941	0.941	0.945	0.945	0.943	0.943	0.941	0.941	0.945	0.94	0.943	0.945	0.945	0.945	0.945	0.94	0.945	0.946	0.945	0.943	0.945	0.943	0.945	0.945	0.945	0.948	0.948	0.948	0.948	0.948	0.945	0.946	0.941	0.939	0.978	0.978	0.978	0.978	0.978	0.98	0.978	0.978
DQ273822_Neocallimastix_sp._GE13_AFTOLID_638	0.93	0.93	0.93	0.93	0.93	0.932	0.932	0.93	0.93	0.933	0.933	0.932	0.932	0.93	0.93	0.937	0.933	0.93	0.937	0.937	0.937	0.937	0.932	0.933	0.938	0.933	0.932	0.933	0.932	0.933	0.933	0.933	0.929	0.929	0.929	0.929	0.929	0.926	0.927	0.923	0.927	0.944	0.944	0.944	0.947	0.943	0.943	0.944	0.941
KR920744_Neocallimastix_frontalis	0.93	0.93	0.93	0.93	0.93	0.932	0.932	0.93	0.93	0.933	0.933	0.932	0.932	0.93	0.93	0.937	0.933	0.93	0.937	0.937	0.937	0.937	0.932	0.933	0.938	0.933	0.932	0.933	0.932	0.933	0.933	0.933	0.929	0.929	0.929	0.929	0.929	0.926	0.927	0.923	0.927	0.944	0.944	0.944	0.947	0.943	0.943	0.944	0.941
KT274174_Neocallimastix_sp._1a	0.93	0.93	0.93	0.93	0.93	0.932	0.932	0.93	0.93	0.933	0.933	0.932	0.932	0.93	0.93	0.937	0.933	0.93	0.937	0.937	0.937	0.937	0.932	0.933	0.938	0.933	0.932	0.933	0.932	0.933	0.933	0.933	0.929	0.929	0.929	0.929	0.929	0.926	0.927	0.923	0.927	0.944	0.944	0.944	0.947	0.943	0.943	0.944	0.941
JQ782544_Neocallimastix_sp._NYF3_put_forntalisDY	0.929	0.929	0.929	0.929	0.929	0.93	0.93	0.929	0.929	0.932	0.932	0.93	0.93	0.929	0.929	0.935	0.932	0.929	0.935	0.935	0.935	0.935	0.93	0.932	0.937	0.932	0.93	0.932	0.93	0.932	0.932	0.932	0.93	0.93	0.93	0.93	0.93	0.927	0.929	0.924	0.926	0.946	0.946	0.946	0.946	0.944	0.944	0.946	0.943
JN939158_Neocallimastix_frontalis_SR4	0.927	0.927	0.927	0.927	0.927	0.929	0.929	0.927	0.927	0.93	0.93	0.929	0.929	0.927	0.927	0.933	0.93	0.927	0.933	0.933	0.933	0.933	0.929	0.93	0.935	0.93	0.929	0.93	0.929	0.93	0.93	0.93	0.929	0.929	0.929	0.929	0.929	0.926	0.927	0.923	0.924	0.944	0.944	0.944	0.944	0.943	0.943	0.944	0.941
JQ782550_Neocallimastix_sp._NYR5	0.926	0.926	0.926	0.926	0.926	0.927	0.927	0.926	0.926	0.929	0.929	0.927	0.927	0.926	0.926	0.932	0.929	0.926	0.932	0.932	0.932	0.932	0.927	0.929	0.934	0.929	0.927	0.929	0.927	0.929	0.929	0.929	0.927	0.927	0.927	0.927	0.927	0.924	0.926	0.921	0.923	0.943	0.943	0.943	0.943	0.941	0.941	0.943	0.94
MT085725_Neocallimastix_frontalis_isolate_Hef7_Clone_3	0.929	0.929	0.929	0.929	0.929	0.93	0.93	0.929	0.929	0.932	0.932	0.93	0.93	0.929	0.929	0.935	0.932	0.93	0.937	0.937	0.937	0.937	0.932	0.933	0.938	0.932	0.93	0.932	0.93	0.932	0.932	0.932	0.93	0.93	0.93	0.93	0.93	0.927	0.929	0.924	0.927	0.947	0.947	0.947	0.947	0.946	0.946	0.947	0.944
JQ782542.1_Neocallimastix_sp._NYF1	0.93	0.93	0.93	0.93	0.93	0.932	0.932	0.93	0.93	0.933	0.933	0.932	0.932	0.93	0.93	0.937	0.933	0.932	0.938	0.938	0.938	0.938	0.933	0.935	0.94	0.933	0.932	0.933	0.932	0.933	0.933	0.933	0.929	0.929	0.929	0.929	0.929	0.926	0.927	0.923	0.929	0.946	0.946	0.946	0.949	0.944	0.944	0.946	0.943
JQ782543.1_Neocallimastix_sp._NYF2	0.93	0.93	0.93	0.93	0.93	0.932	0.932	0.93	0.93	0.933	0.933	0.932	0.932	0.93	0.93	0.935	0.932	0.932	0.938	0.938	0.938	0.938	0.933	0.935	0.94	0.933	0.932	0.933	0.932	0.933	0.933	0.933	0.929	0.929	0.929	0.929	0.929	0.926	0.927	0.923	0.929	0.946	0.946	0.946	0.949	0.944	0.944	0.946	0.943
JQ782545.1_Neocallimastix_sp._NYF4	0.929	0.929	0.929	0.929	0.929	0.93	0.93	0.929	0.929	0.932	0.932	0.93	0.93	0.929	0.929	0.935	0.932	0.93	0.937	0.937	0.937	0.937	0.932	0.933	0.938	0.932	0.93	0.932	0.93	0.932	0.932	0.932	0.927	0.927	0.927	0.927	0.927	0.924	0.926	0.921	0.927	0.944	0.944	0.944	0.947	0.943	0.943	0.944	0.941
JQ782546_Neocallimastix_sp._NYR1	0.924	0.924	0.924	0.924	0.924	0.926	0.926	0.924	0.924	0.927	0.927	0.926	0.926	0.924	0.924	0.93	0.927	0.926	0.932	0.932	0.932	0.932	0.927	0.929	0.934	0.927	0.926	0.927	0.926	0.927	0.927	0.927	0.926	0.926	0.926	0.926	0.926	0.923	0.924	0.92	0.923	0.946	0.946	0.946	0.946	0.944	0.944	0.946	0.943
JQ782547_Neocallimastix_sp._NYR2	0.926	0.926	0.926	0.926	0.926	0.927	0.927	0.926	0.926	0.929	0.929	0.927	0.927	0.926	0.926	0.932	0.929	0.927	0.933	0.933	0.933	0.933	0.929	0.93	0.935	0.929	0.927	0.929	0.927	0.929	0.929	0.929	0.924	0.924	0.924	0.924	0.924	0.921	0.923	0.918	0.924	0.941	0.941	0.941	0.944	0.94	0.94	0.941	0.938
JQ782548_Neocallimastix_sp._NYR3	0.927	0.927	0.927	0.927	0.927	0.929	0.929	0.927	0.927	0.93	0.93	0.929	0.929	0.927	0.927	0.93	0.927	0.929	0.935	0.935	0.935	0.935	0.93	0.932	0.937	0.93	0.929	0.93	0.929	0.93	0.93	0.93	0.929	0.929	0.929	0.929	0.929	0.926	0.927	0.923	0.926	0.946	0.946	0.946	0.946	0.944	0.944	0.946	0.943
JQ782549_Neocallimastix_sp._NYR4	0.929	0.929	0.929	0.929	0.929	0.93	0.93	0.929	0.929	0.932	0.932	0.93	0.93	0.929	0.929	0.934	0.93	0.931	0.937	0.937	0.937	0.937	0.932	0.934	0.938	0.932	0.93	0.932	0.93	0.932	0.932	0.932	0.927	0.927	0.927	0.927	0.927	0.924	0.926	0.921	0.928	0.944	0.944	0.944	0.947	0.943	0.943	0.944	0.941
JF974094_Neocallimastix_sp._1_BRL1	0.934	0.934	0.934	0.934	0.934	0.935	0.935	0.934	0.934	0.937	0.937	0.935	0.935	0.934	0.934	0.94	0.937	0.935	0.941	0.941	0.941	0.941	0.937	0.938	0.943	0.937	0.935	0.937	0.935	0.937	0.937	0.937	0.944	0.944	0.944	0.944	0.944	0.941	0.943	0.938	0.932	0.943	0.943	0.943	0.943	0.941	0.941	0.943	0.94
JF974115_Neocallimastix_sp._5_GRL3	0.934	0.934	0.934	0.934	0.934	0.935	0.935	0.934	0.934	0.937	0.937	0.935	0.935	0.934	0.934	0.94	0.937	0.935	0.941	0.941	0.941	0.941	0.937	0.938	0.943	0.937	0.935	0.937	0.935	0.937	0.937	0.937	0.944	0.944	0.944	0.944	0.944	0.941	0.943	0.938	0.932	0.943	0.943	0.943	0.943	0.941	0.941	0.943	0.94
JF974116_Neocallimastix_sp._6_GRL4	0.934	0.934	0.934	0.934	0.934	0.935	0.935	0.934	0.934	0.937	0.937	0.935	0.935	0.934	0.934	0.94	0.937	0.935	0.941	0.941	0.941	0.941	0.937	0.938	0.943	0.937	0.935	0.937	0.935	0.937	0.937	0.937	0.944	0.944	0.944	0.944	0.944	0.941	0.943	0.938	0.932	0.943	0.943	0.943	0.943	0.941	0.941	0.943	0.94
JF974125_Neocallimastix_sp._7_GFM1	0.934	0.934	0.934	0.934	0.934	0.935	0.935	0.934	0.934	0.937	0.937	0.935	0.935	0.934	0.934	0.94	0.937	0.935	0.941	0.941	0.941	0.941	0.937	0.938	0.943	0.937	0.935	0.937	0.935	0.937	0.937	0.937	0.944	0.944	0.944	0.944	0.944	0.941	0.943	0.938	0.932	0.943	0.943	0.943	0.943	0.941	0.941	0.943	0.94
JF974126_Neocallimastix_sp._8_GFM2	0.934	0.934	0.934	0.934	0.934	0.935	0.935	0.934	0.934	0.937	0.937	0.935	0.935	0.934	0.934	0.94	0.937	0.935	0.941	0.941	0.941	0.941	0.937	0.938	0.943	0.937	0.935	0.937	0.935	0.937	0.937	0.937	0.944	0.944	0.944	0.944	0.944	0.941	0.943	0.938	0.932	0.943	0.943	0.943	0.943	0.941	0.941	0.943	0.94
NG_060329_Neocallimastix_cameroonii	0.934	0.934	0.934	0.934	0.934	0.935	0.935	0.934	0.934	0.937	0.937	0.935	0.935	0.934	0.934	0.94	0.937	0.935	0.941	0.941	0.941	0.941	0.937	0.938	0.943	0.937	0.935	0.937	0.935	0.937	0.937	0.937	0.944	0.944	0.944	0.944	0.944	0.941	0.943	0.938	0.935	0.943	0.943	0.943	0.943	0.941	0.941	0.943	0.94
KR920745.1_Neocallimastix_cameroonii	0.934	0.934	0.934	0.934	0.934	0.935	0.935	0.934	0.934	0.937	0.937	0.935	0.935	0.934	0.934	0.94	0.937	0.935	0.941	0.941	0.941	0.941	0.937	0.938	0.943	0.937	0.935	0.937	0.935	0.937	0.937	0.937	0.944	0.944	0.944	0.944	0.944	0.941	0.943	0.938	0.935	0.943	0.943	0.943	0.943	0.941	0.941	0.943	0.94
MW175298_Isolate_G341_Clone_1	0.934	0.934	0.934	0.934	0.934	0.935	0.935	0.934	0.934	0.937	0.937	0.935	0.935	0.934	0.934	0.94	0.937	0.935	0.941	0.941	0.941	0.941	0.937	0.938	0.943	0.937	0.935	0.937	0.935	0.937	0.937	0.937	0.944	0.944	0.944	0.944	0.944	0.941	0.943	0.938	0.935	0.943	0.943	0.943	0.943	0.941	0.941	0.943	0.94
Neocallimastix_lanati_scaffold_859	0.932	0.932	0.932	0.932	0.932	0.934	0.934	0.932	0.932	0.935	0.935	0.934	0.934	0.932	0.932	0.938	0.935	0.934	0.94	0.94	0.94	0.94	0.935	0.937	0.941	0.935	0.934	0.935	0.934	0.935	0.935	0.935	0.943	0.943	0.943	0.943	0.943	0.94	0.941	0.937	0.931	0.941	0.941	0.941	0.941	0.94	0.94	0.941	0.938
Neocallimastix_lanati_scaffold_208	0.934	0.934	0.934	0.934	0.934	0.935	0.935	0.934	0.934	0.937	0.937	0.935	0.935	0.934	0.934	0.94	0.937	0.935	0.941	0.941	0.941	0.941	0.937	0.938	0.943	0.937	0.935	0.937	0.935	0.937	0.937	0.937	0.944	0.944	0.944	0.944	0.944	0.941	0.943	0.938	0.935	0.943	0.943	0.943	0.943	0.941	0.941	0.943	0.94
Neocallimastix_lanati_scaffold_543	0.934	0.934	0.934	0.934	0.934	0.935	0.935	0.934	0.934	0.937	0.937	0.935	0.935	0.934	0.934	0.94	0.937	0.935	0.941	0.941	0.941	0.941	0.937	0.938	0.943	0.937	0.935	0.937	0.935	0.937	0.937	0.937	0.944	0.944	0.944	0.944	0.944	0.941	0.943	0.938	0.935	0.943	0.943	0.943	0.943	0.941	0.941	0.943	0.94
MW175301_Isolate_G341_Clone_5	0.935	0.935	0.935	0.935	0.935	0.937	0.937	0.935	0.935	0.938	0.938	0.937	0.937	0.935	0.935	0.941	0.938	0.937	0.943	0.943	0.943	0.943	0.938	0.94	0.944	0.938	0.937	0.938	0.937	0.938	0.938	0.938	0.944	0.944	0.944	0.944	0.944	0.941	0.943	0.938	0.934	0.943	0.943	0.943	0.943	0.941	0.941	0.943	0.94
MW175303_Isolate_G341_Clone_7	0.937	0.937	0.937	0.937	0.937	0.938	0.938	0.937	0.937	0.94	0.94	0.938	0.938	0.937	0.937	0.943	0.94	0.938	0.944	0.944	0.944	0.944	0.94	0.941	0.946	0.94	0.938	0.94	0.938	0.94	0.94	0.94	0.946	0.946	0.946	0.946	0.946	0.943	0.944	0.94	0.935	0.944	0.944	0.944	0.944	0.943	0.943	0.944	0.941
Neocallimastix_lanati_scaffold_362	0.932	0.932	0.932	0.932	0.932	0.934	0.934	0.932	0.932	0.935	0.935	0.934	0.934	0.932	0.932	0.938	0.935	0.934	0.94	0.94	0.94	0.94	0.935	0.937	0.941	0.935	0.934	0.935	0.934	0.935	0.935	0.935	0.943	0.943	0.943	0.943	0.943	0.94	0.941	0.937	0.934	0.941	0.941	0.941	0.941	0.94	0.94	0.941	0.938
Neocallimastix_californiae_scaffold_947	0.932	0.932	0.932	0.932	0.932	0.934	0.934	0.932	0.932	0.935	0.935	0.934	0.934	0.932	0.932	0.938	0.935	0.934	0.94	0.94	0.94	0.94	0.935	0.937	0.941	0.935	0.934	0.935	0.934	0.935	0.935	0.935	0.943	0.943	0.943	0.943	0.943	0.94	0.941	0.937	0.934	0.941	0.941	0.941	0.941	0.94	0.94	0.941	0.938
Neocallimastix_californiae_scaffold_1752	0.932	0.932	0.932	0.932	0.932	0.934	0.934	0.932	0.932	0.935	0.935	0.934	0.934	0.932	0.932	0.938	0.935	0.934	0.94	0.94	0.94	0.94	0.935	0.937	0.941	0.935	0.934	0.935	0.934	0.935	0.935	0.935	0.943	0.943	0.943	0.943	0.943	0.94	0.941	0.937	0.934	0.941	0.941	0.941	0.941	0.94	0.94	0.941	0.938
MW175299_Isolate_G341_Clone_3	0.937	0.937	0.937	0.937	0.937	0.938	0.938	0.937	0.937	0.94	0.94	0.938	0.938	0.937	0.937	0.943	0.94	0.938	0.944	0.944	0.944	0.944	0.94	0.941	0.946	0.94	0.938	0.94	0.938	0.94	0.94	0.94	0.946	0.946	0.946	0.946	0.946	0.943	0.944	0.94	0.935	0.944	0.944	0.944	0.944	0.943	0.943	0.944	0.941
MW175300_Isolate_G341_Clone_4	0.935	0.935	0.935	0.935	0.935	0.937	0.937	0.935	0.935	0.938	0.938	0.937	0.937	0.935	0.935	0.941	0.938	0.937	0.943	0.943	0.943	0.943	0.938	0.94	0.944	0.938	0.937	0.938	0.937	0.938	0.938	0.938	0.944	0.944	0.944	0.944	0.944	0.941	0.943	0.938	0.934	0.943	0.943	0.943	0.943	0.941	0.941	0.943	0.94
MW175304_Isolate_G341_Clone_8	0.932	0.932	0.932	0.932	0.932	0.934	0.934	0.932	0.932	0.935	0.935	0.934	0.934	0.932	0.932	0.938	0.935	0.934	0.94	0.94	0.94	0.94	0.935	0.937	0.941	0.935	0.934	0.935	0.934	0.935	0.935	0.935	0.943	0.943	0.943	0.943	0.943	0.94	0.941	0.937	0.931	0.941	0.941	0.941	0.941	0.94	0.94	0.941	0.938
MW175302_Isolate_G341_Clone_6	0.925	0.925	0.925	0.925	0.925	0.926	0.926	0.925	0.925	0.928	0.928	0.926	0.926	0.925	0.925	0.931	0.928	0.926	0.932	0.932	0.932	0.932	0.928	0.929	0.934	0.928	0.926	0.928	0.926	0.928	0.928	0.928	0.935	0.935	0.935	0.935	0.935	0.932	0.934	0.929	0.926	0.934	0.934	0.934	0.934	0.933	0.932	0.934	0.931
DQ273829_Cyllamyces_aberensis_AFTOLID_846	0.901	0.901	0.901	0.901	0.901	0.903	0.903	0.901	0.901	0.904	0.904	0.903	0.903	0.901	0.901	0.907	0.906	0.901	0.907	0.907	0.907	0.907	0.903	0.91	0.909	0.906	0.904	0.906	0.904	0.906	0.906	0.906	0.906	0.906	0.906	0.906	0.906	0.903	0.904	0.9	0.903	0.913	0.913	0.913	0.917	0.912	0.912	0.913	0.911
KY386297_Cyllamyces_sp._BFK364	0.91	0.91	0.91	0.91	0.91	0.912	0.912	0.91	0.91	0.913	0.913	0.912	0.912	0.91	0.91	0.917	0.915	0.911	0.913	0.913	0.913	0.913	0.909	0.92	0.918	0.915	0.913	0.915	0.913	0.915	0.915	0.915	0.915	0.915	0.915	0.915	0.915	0.912	0.913	0.909	0.912	0.913	0.913	0.913	0.917	0.912	0.912	0.913	0.911
JQ782554_Caecomyces_sp._CYF	0.904	0.904	0.904	0.904	0.904	0.906	0.906	0.904	0.904	0.907	0.907	0.906	0.906	0.904	0.904	0.91	0.909	0.904	0.907	0.907	0.907	0.907	0.903	0.913	0.912	0.909	0.907	0.909	0.907	0.909	0.909	0.909	0.909	0.909	0.909	0.909	0.909	0.906	0.907	0.903	0.907	0.907	0.907	0.907	0.91	0.906	0.906	0.907	0.904
JQ782555_Caecomyces_sp._CYR	0.906	0.906	0.906	0.906	0.906	0.907	0.907	0.906	0.906	0.909	0.909	0.907	0.907	0.906	0.906	0.912	0.91	0.906	0.909	0.909	0.909	0.909	0.904	0.915	0.914	0.91	0.909	0.91	0.909	0.91	0.91	0.91	0.91	0.91	0.91	0.91	0.91	0.907	0.909	0.904	0.909	0.909	0.909	0.909	0.912	0.907	0.907	0.909	0.906
KM878679_Caecomyces_communis_OF1	0.906	0.906	0.906	0.906	0.906	0.907	0.907	0.906	0.906	0.909	0.909	0.907	0.907	0.906	0.906	0.912	0.91	0.906	0.909	0.909	0.909	0.909	0.904	0.915	0.914	0.91	0.909	0.91	0.909	0.91	0.91	0.91	0.91	0.91	0.91	0.91	0.91	0.907	0.909	0.904	0.909	0.909	0.909	0.909	0.912	0.907	0.907	0.909	0.906
MW175289_Isolate_PP313_Clone_1	0.912	0.912	0.912	0.912	0.912	0.914	0.914	0.912	0.912	0.915	0.915	0.914	0.914	0.912	0.912	0.918	0.917	0.912	0.915	0.915	0.915	0.915	0.911	0.921	0.92	0.917	0.915	0.917	0.915	0.917	0.917	0.917	0.917	0.917	0.917	0.917	0.917	0.914	0.915	0.911	0.915	0.915	0.915	0.915	0.918	0.914	0.914	0.915	0.912
MW175291_Isolate_PP313_Clone_3	0.912	0.912	0.912	0.912	0.912	0.914	0.914	0.912	0.912	0.915	0.915	0.914	0.914	0.912	0.912	0.918	0.917	0.912	0.915	0.915	0.915	0.915	0.911	0.921	0.92	0.917	0.915	0.917	0.915	0.917	0.917	0.917	0.917	0.917	0.917	0.917	0.917	0.914	0.915	0.911	0.915	0.915	0.915	0.915	0.918	0.914	0.914	0.915	0.912
MW175293_Isolate_PP313_Clone_5	0.913	0.913	0.913	0.913	0.913	0.915	0.915	0.913	0.913	0.917	0.917	0.915	0.915	0.913	0.913	0.92	0.918	0.914	0.917	0.917	0.917	0.917	0.912	0.923	0.921	0.918	0.917	0.918	0.917	0.918	0.918	0.918	0.918	0.918	0.918	0.918	0.918	0.915	0.917	0.912	0.917	0.917	0.917	0.917	0.92	0.915	0.915	0.917	0.914
Caecomyces_churrovis_scaffold_6518	0.915	0.915	0.915	0.915	0.915	0.917	0.917	0.915	0.915	0.918	0.918	0.917	0.917	0.915	0.915	0.921	0.92	0.915	0.918	0.918	0.918	0.918	0.913	0.924	0.923	0.92	0.918	0.92	0.918	0.92	0.92	0.92	0.92	0.92	0.92	0.92	0.92	0.917	0.918	0.913	0.918	0.918	0.918	0.918	0.921	0.917	0.917	0.918	0.915
Caecomyces_churrovis_scaffold_5703	0.915	0.915	0.915	0.915	0.915	0.917	0.917	0.915	0.915	0.918	0.918	0.917	0.917	0.915	0.915	0.921	0.92	0.915	0.918	0.918	0.918	0.918	0.913	0.924	0.923	0.92	0.918	0.92	0.918	0.92	0.92	0.92	0.92	0.92	0.92	0.92	0.92	0.917	0.918	0.913	0.918	0.918	0.918	0.918	0.921	0.917	0.917	0.918	0.915
Caecomyces_churrovis_scaffold_5318	0.915	0.915	0.915	0.915	0.915	0.917	0.917	0.915	0.915	0.918	0.918	0.917	0.917	0.915	0.915	0.921	0.92	0.915	0.918	0.918	0.918	0.918	0.913	0.924	0.923	0.92	0.918	0.92	0.918	0.92	0.92	0.92	0.92	0.92	0.92	0.92	0.92	0.917	0.918	0.913	0.918	0.918	0.918	0.918	0.921	0.917	0.917	0.918	0.915
Caecomyces_churrovis_scaffold_5257	0.915	0.915	0.915	0.915	0.915	0.917	0.917	0.915	0.915	0.918	0.918	0.917	0.917	0.915	0.915	0.921	0.92	0.915	0.918	0.918	0.918	0.918	0.913	0.924	0.923	0.92	0.918	0.92	0.918	0.92	0.92	0.92	0.92	0.92	0.92	0.92	0.92	0.917	0.918	0.913	0.918	0.918	0.918	0.918	0.921	0.917	0.917	0.918	0.915
Caecomyces_churrovis_scaffold_4866	0.915	0.915	0.915	0.915	0.915	0.917	0.917	0.915	0.915	0.918	0.918	0.917	0.917	0.915	0.915	0.921	0.92	0.915	0.918	0.918	0.918	0.918	0.913	0.924	0.923	0.92	0.918	0.92	0.918	0.92	0.92	0.92	0.92	0.92	0.92	0.92	0.92	0.917	0.918	0.913	0.918	0.918	0.918	0.918	0.921	0.917	0.917	0.918	0.915
Caecomyces_churrovis_scaffold_4365	0.915	0.915	0.915	0.915	0.915	0.917	0.917	0.915	0.915	0.918	0.918	0.917	0.917	0.915	0.915	0.921	0.92	0.915	0.918	0.918	0.918	0.918	0.913	0.924	0.923	0.92	0.918	0.92	0.918	0.92	0.92	0.92	0.92	0.92	0.92	0.92	0.92	0.917	0.918	0.913	0.918	0.918	0.918	0.918	0.921	0.917	0.917	0.918	0.915
MW175292_Isolate_PP313_Clone_4	0.911	0.911	0.911	0.911	0.911	0.912	0.912	0.911	0.911	0.914	0.914	0.912	0.912	0.911	0.911	0.917	0.915	0.911	0.914	0.914	0.914	0.914	0.909	0.92	0.918	0.915	0.914	0.915	0.914	0.915	0.915	0.915	0.915	0.915	0.915	0.915	0.915	0.912	0.914	0.909	0.914	0.914	0.914	0.914	0.917	0.912	0.912	0.914	0.911
MW175295_Isolate_PP313_Clone_7	0.912	0.912	0.912	0.912	0.912	0.914	0.914	0.912	0.912	0.915	0.915	0.914	0.914	0.912	0.912	0.918	0.917	0.912	0.915	0.915	0.915	0.915	0.911	0.921	0.92	0.917	0.915	0.917	0.915	0.917	0.917	0.917	0.917	0.917	0.917	0.917	0.917	0.914	0.915	0.911	0.915	0.915	0.915	0.915	0.918	0.914	0.914	0.915	0.912
MW175296_Isolate_PP313_Clone_8	0.9	0.9	0.9	0.9	0.9	0.901	0.901	0.9	0.9	0.903	0.903	0.901	0.901	0.9	0.9	0.906	0.904	0.9	0.903	0.903	0.903	0.903	0.898	0.909	0.908	0.904	0.903	0.904	0.903	0.904	0.904	0.904	0.904	0.904	0.904	0.904	0.904	0.901	0.903	0.898	0.903	0.903	0.903	0.903	0.906	0.901	0.901	0.903	0.9
MW175294_Isolate_PP313_Clone_6	0.913	0.913	0.913	0.913	0.913	0.915	0.915	0.913	0.913	0.917	0.917	0.915	0.915	0.913	0.913	0.92	0.918	0.914	0.917	0.917	0.917	0.917	0.912	0.923	0.921	0.918	0.917	0.918	0.917	0.918	0.918	0.918	0.918	0.918	0.918	0.918	0.918	0.915	0.917	0.912	0.917	0.917	0.917	0.917	0.92	0.915	0.915	0.917	0.914
MW175290_Isolate_PP313_Clone_2	0.913	0.913	0.913	0.913	0.913	0.915	0.915	0.913	0.913	0.917	0.917	0.915	0.915	0.913	0.913	0.92	0.918	0.914	0.917	0.917	0.917	0.917	0.912	0.923	0.921	0.918	0.917	0.918	0.917	0.918	0.918	0.918	0.918	0.918	0.918	0.918	0.918	0.915	0.917	0.912	0.917	0.917	0.917	0.917	0.92	0.915	0.915	0.917	0.914
MW175297_Isolate_PP313_Clone_9	0.909	0.909	0.909	0.909	0.909	0.911	0.911	0.909	0.909	0.912	0.912	0.911	0.911	0.909	0.909	0.915	0.914	0.909	0.912	0.912	0.912	0.912	0.908	0.918	0.917	0.914	0.912	0.914	0.912	0.914	0.914	0.914	0.914	0.914	0.914	0.914	0.914	0.911	0.912	0.908	0.912	0.912	0.912	0.912	0.915	0.911	0.911	0.912	0.909
JF974096_Piromyces_sp._1_BRL3	0.897	0.897	0.897	0.897	0.897	0.898	0.898	0.897	0.897	0.9	0.9	0.898	0.898	0.897	0.897	0.9	0.898	0.898	0.904	0.904	0.904	0.904	0.9	0.906	0.906	0.901	0.9	0.901	0.9	0.901	0.901	0.901	0.904	0.904	0.904	0.904	0.904	0.901	0.903	0.898	0.901	0.903	0.903	0.903	0.906	0.901	0.901	0.903	0.9
JF974097_Piromyces_sp._2_BRL4	0.897	0.897	0.897	0.897	0.897	0.898	0.898	0.897	0.897	0.9	0.9	0.898	0.898	0.897	0.897	0.9	0.898	0.898	0.904	0.904	0.904	0.904	0.9	0.906	0.906	0.901	0.9	0.901	0.9	0.901	0.901	0.901	0.904	0.904	0.904	0.904	0.904	0.901	0.903	0.898	0.901	0.903	0.903	0.903	0.906	0.901	0.901	0.903	0.9
JF974098_Piromyces_sp._3_BRL5	0.897	0.897	0.897	0.897	0.897	0.898	0.898	0.897	0.897	0.9	0.9	0.898	0.898	0.897	0.897	0.9	0.898	0.898	0.904	0.904	0.904	0.904	0.9	0.906	0.906	0.901	0.9	0.901	0.9	0.901	0.901	0.901	0.904	0.904	0.904	0.904	0.904	0.901	0.903	0.898	0.901	0.903	0.903	0.903	0.906	0.901	0.901	0.903	0.9
JF974117_Piromyces_sp._4_GRL5	0.897	0.897	0.897	0.897	0.897	0.898	0.898	0.897	0.897	0.9	0.9	0.898	0.898	0.897	0.897	0.9	0.898	0.898	0.904	0.904	0.904	0.904	0.9	0.906	0.906	0.901	0.9	0.901	0.9	0.901	0.901	0.901	0.904	0.904	0.904	0.904	0.904	0.901	0.903	0.898	0.901	0.903	0.903	0.903	0.906	0.901	0.901	0.903	0.9
JF974118_Piromyces_sp._5_GRL6	0.897	0.897	0.897	0.897	0.897	0.898	0.898	0.897	0.897	0.9	0.9	0.898	0.898	0.897	0.897	0.9	0.898	0.898	0.904	0.904	0.904	0.904	0.9	0.906	0.906	0.901	0.9	0.901	0.9	0.901	0.901	0.901	0.904	0.904	0.904	0.904	0.904	0.901	0.903	0.898	0.901	0.903	0.903	0.903	0.906	0.901	0.901	0.903	0.9
JF974119_Piromyces_sp._6_GRL7	0.897	0.897	0.897	0.897	0.897	0.898	0.898	0.897	0.897	0.9	0.9	0.898	0.898	0.897	0.897	0.9	0.898	0.898	0.904	0.904	0.904	0.904	0.9	0.906	0.906	0.901	0.9	0.901	0.9	0.901	0.901	0.901	0.904	0.904	0.904	0.904	0.904	0.901	0.903	0.898	0.901	0.903	0.903	0.903	0.906	0.901	0.901	0.903	0.9
JF974120_Piromyces_sp._7_GRL8	0.897	0.897	0.897	0.897	0.897	0.898	0.898	0.897	0.897	0.9	0.9	0.898	0.898	0.897	0.897	0.9	0.898	0.898	0.904	0.904	0.904	0.904	0.9	0.906	0.906	0.901	0.9	0.901	0.9	0.901	0.901	0.901	0.904	0.904	0.904	0.904	0.904	0.901	0.903	0.898	0.901	0.903	0.903	0.903	0.906	0.901	0.901	0.903	0.9
JF974127_Piromyces_sp._10_GFM3	0.897	0.897	0.897	0.897	0.897	0.898	0.898	0.897	0.897	0.9	0.9	0.898	0.898	0.897	0.897	0.9	0.898	0.898	0.904	0.904	0.904	0.904	0.9	0.906	0.906	0.901	0.9	0.901	0.9	0.901	0.901	0.901	0.904	0.904	0.904	0.904	0.904	0.901	0.903	0.898	0.901	0.903	0.903	0.903	0.906	0.901	0.901	0.903	0.9
MK775314.1_Piromyces_communis_strain_GFKJa192	0.897	0.897	0.897	0.897	0.897	0.898	0.898	0.897	0.897	0.9	0.9	0.898	0.898	0.897	0.897	0.9	0.898	0.898	0.904	0.904	0.904	0.904	0.9	0.906	0.906	0.901	0.9	0.901	0.9	0.901	0.901	0.901	0.904	0.904	0.904	0.904	0.904	0.901	0.903	0.898	0.9	0.903	0.903	0.903	0.906	0.901	0.901	0.903	0.9
JF974121_Piromyces_sp._8_GRL9	0.898	0.898	0.898	0.898	0.898	0.9	0.9	0.898	0.898	0.901	0.901	0.9	0.9	0.898	0.898	0.901	0.9	0.9	0.906	0.906	0.906	0.906	0.901	0.907	0.907	0.903	0.901	0.903	0.901	0.903	0.903	0.903	0.906	0.906	0.906	0.906	0.906	0.903	0.904	0.9	0.901	0.904	0.904	0.904	0.907	0.903	0.903	0.904	0.901
JF974122_Piromyces_sp._9_GRL10	0.898	0.898	0.898	0.898	0.898	0.9	0.9	0.898	0.898	0.901	0.901	0.9	0.9	0.898	0.898	0.901	0.9	0.9	0.906	0.906	0.906	0.906	0.901	0.907	0.907	0.903	0.901	0.903	0.901	0.903	0.903	0.903	0.906	0.906	0.906	0.906	0.906	0.903	0.904	0.9	0.901	0.904	0.904	0.904	0.907	0.903	0.903	0.904	0.901
MG584190_Feramyces_austinii_F3B	0.906	0.906	0.906	0.906	0.906	0.907	0.907	0.906	0.906	0.909	0.909	0.907	0.907	0.906	0.906	0.912	0.91	0.904	0.909	0.909	0.909	0.909	0.904	0.909	0.911	0.91	0.909	0.91	0.909	0.91	0.91	0.91	0.917	0.917	0.917	0.917	0.917	0.915	0.915	0.91	0.903	0.915	0.915	0.915	0.918	0.914	0.915	0.915	0.914
MG584191_Feramyces_austinii_R4A	0.91	0.91	0.91	0.91	0.91	0.912	0.912	0.91	0.91	0.913	0.913	0.912	0.912	0.91	0.91	0.917	0.915	0.909	0.913	0.913	0.913	0.913	0.909	0.913	0.915	0.915	0.913	0.915	0.913	0.915	0.915	0.915	0.921	0.921	0.921	0.921	0.921	0.918	0.92	0.915	0.907	0.92	0.92	0.92	0.923	0.918	0.92	0.92	0.918
MG605675_Feramyces_austinii_F2c	0.91	0.91	0.91	0.91	0.91	0.912	0.912	0.91	0.91	0.913	0.913	0.912	0.912	0.91	0.91	0.917	0.915	0.909	0.913	0.913	0.913	0.913	0.909	0.913	0.915	0.915	0.913	0.915	0.913	0.915	0.915	0.915	0.921	0.921	0.921	0.921	0.921	0.918	0.92	0.915	0.907	0.92	0.92	0.92	0.923	0.918	0.92	0.92	0.918
MG584193_Feramyces_austinii_F3A	0.909	0.909	0.909	0.909	0.909	0.91	0.91	0.909	0.909	0.912	0.912	0.91	0.91	0.909	0.909	0.915	0.913	0.907	0.912	0.912	0.912	0.912	0.907	0.912	0.914	0.913	0.912	0.913	0.912	0.913	0.913	0.913	0.92	0.92	0.92	0.92	0.92	0.917	0.918	0.913	0.906	0.918	0.918	0.918	0.921	0.917	0.918	0.918	0.917
MG584192_Feramyces_austinii_DS10	0.907	0.907	0.907	0.907	0.907	0.909	0.909	0.907	0.907	0.91	0.91	0.909	0.909	0.907	0.907	0.913	0.912	0.906	0.91	0.91	0.91	0.91	0.906	0.91	0.912	0.912	0.91	0.912	0.91	0.912	0.912	0.912	0.918	0.918	0.918	0.918	0.918	0.915	0.917	0.912	0.904	0.917	0.917	0.917	0.92	0.915	0.917	0.917	0.915
MG605676_Feramyces_austinii_F2a	0.906	0.906	0.906	0.906	0.906	0.908	0.908	0.906	0.906	0.909	0.909	0.908	0.908	0.906	0.906	0.912	0.911	0.905	0.909	0.909	0.909	0.909	0.905	0.909	0.914	0.911	0.909	0.911	0.909	0.911	0.911	0.911	0.917	0.917	0.917	0.917	0.917	0.914	0.915	0.911	0.906	0.915	0.915	0.915	0.918	0.914	0.915	0.915	0.914
KP205570_Buwchfawromyces_eastonii_GE09	0.889	0.889	0.889	0.889	0.889	0.89	0.89	0.892	0.892	0.892	0.892	0.894	0.894	0.892	0.889	0.892	0.889	0.889	0.892	0.892	0.892	0.895	0.887	0.889	0.891	0.89	0.889	0.89	0.889	0.89	0.89	0.89	0.894	0.894	0.894	0.894	0.894	0.89	0.894	0.889	0.881	0.881	0.881	0.881	0.884	0.88	0.883	0.881	0.881
MK775310_Tahromyces_munnarensis_strain_Tahr_TDFKJa193	0.895	0.895	0.895	0.895	0.895	0.897	0.897	0.898	0.898	0.898	0.898	0.9	0.9	0.898	0.895	0.898	0.895	0.896	0.894	0.894	0.894	0.897	0.889	0.891	0.892	0.897	0.895	0.897	0.895	0.897	0.897	0.897	0.894	0.894	0.894	0.894	0.894	0.891	0.894	0.889	0.883	0.889	0.889	0.889	0.892	0.888	0.891	0.889	0.889
MK775313_Tahromyces_munnarensis_strain_Tahr_TDFKJa1927	0.895	0.895	0.895	0.895	0.895	0.897	0.897	0.898	0.898	0.898	0.898	0.9	0.9	0.898	0.895	0.898	0.895	0.896	0.894	0.894	0.894	0.897	0.889	0.891	0.892	0.897	0.895	0.897	0.895	0.897	0.897	0.897	0.894	0.894	0.894	0.894	0.894	0.891	0.894	0.889	0.883	0.889	0.889	0.889	0.892	0.888	0.891	0.889	0.889
MK775312_Tahromyces_munnarensis_strain_Tahr_TDFKJa1924	0.895	0.895	0.895	0.895	0.895	0.897	0.897	0.898	0.898	0.898	0.898	0.9	0.9	0.898	0.895	0.898	0.895	0.896	0.894	0.894	0.894	0.897	0.889	0.891	0.892	0.897	0.895	0.897	0.895	0.897	0.897	0.897	0.894	0.894	0.894	0.894	0.894	0.891	0.894	0.889	0.883	0.889	0.889	0.889	0.892	0.888	0.891	0.889	0.889
MK775311_Tahromyces_munnarensis_strain_Tahr_TDFKJa1926	0.895	0.895	0.895	0.895	0.895	0.897	0.897	0.898	0.898	0.898	0.898	0.9	0.9	0.898	0.895	0.898	0.895	0.896	0.894	0.894	0.894	0.897	0.889	0.891	0.892	0.897	0.895	0.897	0.895	0.897	0.897	0.897	0.894	0.894	0.894	0.894	0.894	0.891	0.894	0.889	0.883	0.889	0.889	0.889	0.892	0.888	0.891	0.889	0.889
MK775330_Neocallimastigaceae_sp._strain_Goat_GFH682	0.889	0.889	0.889	0.889	0.889	0.889	0.889	0.89	0.89	0.889	0.889	0.89	0.89	0.89	0.886	0.892	0.889	0.889	0.89	0.892	0.892	0.894	0.887	0.889	0.891	0.89	0.889	0.89	0.889	0.89	0.89	0.89	0.895	0.895	0.895	0.895	0.895	0.892	0.895	0.89	0.883	0.884	0.884	0.884	0.886	0.883	0.883	0.884	0.881
MK775332_Neocallimastigaceae_sp._strain_Goat_GFH686	0.889	0.889	0.889	0.889	0.889	0.889	0.889	0.89	0.89	0.889	0.889	0.89	0.89	0.89	0.886	0.892	0.889	0.889	0.89	0.892	0.892	0.894	0.887	0.889	0.891	0.89	0.889	0.89	0.889	0.89	0.89	0.89	0.895	0.895	0.895	0.895	0.895	0.892	0.895	0.89	0.883	0.884	0.884	0.884	0.886	0.883	0.883	0.884	0.881
MK775333_Neocallimastigaceae_sp._strain_Sheep_SFH683	0.892	0.892	0.892	0.892	0.892	0.892	0.892	0.894	0.894	0.892	0.892	0.894	0.894	0.894	0.889	0.895	0.892	0.892	0.894	0.895	0.895	0.897	0.89	0.892	0.894	0.894	0.892	0.894	0.892	0.894	0.894	0.894	0.898	0.898	0.898	0.898	0.898	0.895	0.898	0.894	0.886	0.887	0.887	0.887	0.889	0.886	0.886	0.887	0.884
MK910268_Joblinomyces_apicalis-Neocallimastigaceae_sp._strain_GFH683	0.892	0.892	0.892	0.892	0.892	0.892	0.892	0.894	0.894	0.892	0.892	0.894	0.894	0.894	0.889	0.892	0.889	0.892	0.894	0.895	0.895	0.897	0.89	0.892	0.894	0.894	0.892	0.894	0.892	0.894	0.894	0.894	0.898	0.898	0.898	0.898	0.898	0.895	0.898	0.894	0.886	0.887	0.887	0.887	0.889	0.886	0.886	0.887	0.884
MK775331_Neocallimastigaceae_sp._strain_Goat_GFH685	0.889	0.889	0.889	0.889	0.889	0.889	0.889	0.891	0.891	0.889	0.889	0.891	0.891	0.891	0.886	0.892	0.889	0.889	0.891	0.892	0.892	0.894	0.888	0.889	0.891	0.891	0.889	0.891	0.889	0.891	0.891	0.891	0.895	0.895	0.895	0.895	0.895	0.892	0.895	0.891	0.883	0.884	0.884	0.884	0.886	0.883	0.883	0.884	0.882
MT085665_Joblinomyces_apicalis_isolate_GFH681	0.889	0.889	0.889	0.889	0.889	0.889	0.889	0.89	0.89	0.889	0.889	0.89	0.89	0.89	0.886	0.892	0.889	0.889	0.89	0.892	0.892	0.894	0.887	0.889	0.891	0.89	0.889	0.89	0.889	0.89	0.89	0.89	0.897	0.897	0.897	0.897	0.897	0.894	0.897	0.892	0.883	0.884	0.884	0.884	0.886	0.883	0.883	0.884	0.881
R1_CloneA1	0.894	0.894	0.894	0.894	0.894	0.895	0.895	0.894	0.894	0.897	0.897	0.895	0.895	0.894	0.894	0.897	0.892	0.892	0.887	0.887	0.887	0.887	0.883	0.89	0.892	0.895	0.894	0.895	0.894	0.895	0.895	0.895	0.894	0.894	0.894	0.894	0.894	0.89	0.892	0.887	0.888	0.892	0.892	0.892	0.895	0.891	0.892	0.892	0.891
R3_CloneB3	0.89	0.89	0.89	0.89	0.89	0.892	0.892	0.89	0.89	0.894	0.894	0.892	0.892	0.89	0.89	0.894	0.892	0.889	0.887	0.887	0.887	0.887	0.883	0.89	0.892	0.892	0.89	0.892	0.89	0.892	0.892	0.892	0.894	0.894	0.894	0.894	0.894	0.89	0.892	0.887	0.888	0.892	0.892	0.892	0.895	0.891	0.892	0.892	0.891
R3_CloneB5	0.89	0.89	0.89	0.89	0.89	0.892	0.892	0.89	0.89	0.894	0.894	0.892	0.892	0.89	0.89	0.894	0.892	0.889	0.887	0.887	0.887	0.887	0.883	0.89	0.892	0.892	0.89	0.892	0.89	0.892	0.892	0.892	0.894	0.894	0.894	0.894	0.894	0.89	0.892	0.887	0.888	0.892	0.892	0.892	0.895	0.891	0.892	0.892	0.891
R4_CloneB9	0.887	0.887	0.887	0.887	0.887	0.889	0.889	0.887	0.887	0.89	0.89	0.889	0.889	0.887	0.887	0.89	0.889	0.886	0.884	0.884	0.884	0.884	0.88	0.887	0.889	0.889	0.887	0.889	0.887	0.889	0.889	0.889	0.89	0.89	0.89	0.89	0.89	0.887	0.889	0.884	0.884	0.889	0.889	0.889	0.892	0.888	0.889	0.889	0.888
R1_CloneA6	0.889	0.889	0.889	0.889	0.889	0.89	0.89	0.889	0.889	0.892	0.892	0.89	0.89	0.889	0.889	0.889	0.884	0.888	0.886	0.886	0.886	0.886	0.881	0.886	0.888	0.89	0.889	0.89	0.889	0.89	0.89	0.89	0.889	0.889	0.889	0.889	0.889	0.886	0.887	0.883	0.883	0.89	0.89	0.89	0.894	0.889	0.89	0.89	0.889
R2_CloneA7	0.886	0.886	0.886	0.886	0.886	0.887	0.887	0.886	0.886	0.889	0.889	0.887	0.887	0.886	0.886	0.886	0.884	0.884	0.886	0.886	0.886	0.886	0.881	0.886	0.888	0.887	0.886	0.887	0.886	0.887	0.887	0.887	0.889	0.889	0.889	0.889	0.889	0.886	0.887	0.883	0.883	0.89	0.89	0.89	0.894	0.889	0.89	0.89	0.889
R1_CloneA2	0.887	0.887	0.887	0.887	0.887	0.889	0.889	0.887	0.887	0.89	0.89	0.889	0.889	0.887	0.887	0.887	0.886	0.886	0.887	0.887	0.887	0.887	0.883	0.887	0.889	0.889	0.887	0.889	0.887	0.889	0.889	0.889	0.89	0.89	0.89	0.89	0.89	0.887	0.889	0.884	0.884	0.892	0.892	0.892	0.895	0.891	0.892	0.892	0.891
R5_CloneC2	0.887	0.887	0.887	0.887	0.887	0.889	0.889	0.887	0.887	0.89	0.89	0.889	0.889	0.887	0.887	0.887	0.886	0.886	0.887	0.887	0.887	0.887	0.883	0.887	0.889	0.889	0.887	0.889	0.887	0.889	0.889	0.889	0.89	0.89	0.89	0.89	0.89	0.887	0.889	0.884	0.884	0.892	0.892	0.892	0.895	0.891	0.892	0.892	0.891
R3_CloneB1	0.884	0.884	0.884	0.884	0.884	0.886	0.886	0.884	0.884	0.887	0.887	0.886	0.886	0.884	0.884	0.884	0.883	0.883	0.884	0.884	0.884	0.884	0.88	0.884	0.886	0.886	0.884	0.886	0.884	0.886	0.886	0.886	0.887	0.887	0.887	0.887	0.887	0.884	0.886	0.881	0.881	0.889	0.889	0.889	0.892	0.888	0.889	0.889	0.888
R2_CloneA8	0.884	0.884	0.884	0.884	0.884	0.886	0.886	0.884	0.884	0.887	0.887	0.886	0.886	0.884	0.884	0.887	0.886	0.883	0.884	0.884	0.884	0.884	0.88	0.884	0.886	0.886	0.884	0.886	0.884	0.886	0.886	0.886	0.887	0.887	0.887	0.887	0.887	0.884	0.886	0.881	0.881	0.889	0.889	0.889	0.892	0.888	0.889	0.889	0.888
R3_CloneB4	0.887	0.887	0.887	0.887	0.887	0.889	0.889	0.887	0.887	0.89	0.89	0.889	0.889	0.887	0.887	0.89	0.889	0.886	0.887	0.887	0.887	0.887	0.883	0.887	0.889	0.889	0.887	0.889	0.887	0.889	0.889	0.889	0.89	0.89	0.89	0.89	0.89	0.887	0.889	0.884	0.884	0.892	0.892	0.892	0.895	0.891	0.892	0.892	0.891
R1_CloneA3	0.889	0.889	0.889	0.889	0.889	0.89	0.89	0.889	0.889	0.892	0.892	0.89	0.89	0.889	0.889	0.892	0.887	0.888	0.886	0.886	0.886	0.886	0.881	0.886	0.888	0.89	0.889	0.89	0.889	0.89	0.89	0.89	0.889	0.889	0.889	0.889	0.889	0.886	0.887	0.883	0.883	0.89	0.89	0.89	0.894	0.889	0.89	0.89	0.889
R1_CloneA4	0.889	0.889	0.889	0.889	0.889	0.89	0.89	0.889	0.889	0.892	0.892	0.89	0.89	0.889	0.889	0.892	0.887	0.888	0.886	0.886	0.886	0.886	0.881	0.886	0.888	0.89	0.889	0.89	0.889	0.89	0.89	0.89	0.889	0.889	0.889	0.889	0.889	0.886	0.887	0.883	0.883	0.89	0.89	0.89	0.894	0.889	0.89	0.89	0.889
R3_CloneB2	0.889	0.889	0.889	0.889	0.889	0.89	0.89	0.889	0.889	0.892	0.892	0.89	0.89	0.889	0.889	0.892	0.887	0.888	0.886	0.886	0.886	0.886	0.881	0.886	0.888	0.89	0.889	0.89	0.889	0.89	0.89	0.89	0.889	0.889	0.889	0.889	0.889	0.886	0.887	0.883	0.883	0.89	0.89	0.89	0.894	0.889	0.89	0.89	0.889
R4_CloneB10	0.889	0.889	0.889	0.889	0.889	0.89	0.89	0.889	0.889	0.892	0.892	0.89	0.89	0.889	0.889	0.892	0.887	0.888	0.886	0.886	0.886	0.886	0.881	0.886	0.888	0.89	0.889	0.89	0.889	0.89	0.89	0.89	0.889	0.889	0.889	0.889	0.889	0.886	0.887	0.883	0.883	0.89	0.89	0.89	0.894	0.889	0.89	0.89	0.889
R5_CloneC4	0.889	0.889	0.889	0.889	0.889	0.89	0.89	0.889	0.889	0.892	0.892	0.89	0.89	0.889	0.889	0.892	0.887	0.888	0.886	0.886	0.886	0.886	0.881	0.886	0.888	0.89	0.889	0.89	0.889	0.89	0.89	0.89	0.889	0.889	0.889	0.889	0.889	0.886	0.887	0.883	0.883	0.89	0.89	0.89	0.894	0.889	0.89	0.89	0.889
R5_CloneC3	0.889	0.889	0.889	0.889	0.889	0.89	0.89	0.889	0.889	0.892	0.892	0.89	0.89	0.889	0.889	0.892	0.887	0.888	0.886	0.886	0.886	0.886	0.881	0.886	0.888	0.89	0.889	0.89	0.889	0.89	0.89	0.89	0.889	0.889	0.889	0.889	0.889	0.886	0.887	0.883	0.883	0.89	0.89	0.89	0.894	0.889	0.89	0.89	0.889
R1_CloneA5	0.887	0.887	0.887	0.887	0.887	0.889	0.889	0.887	0.887	0.89	0.89	0.889	0.889	0.887	0.887	0.89	0.886	0.886	0.884	0.884	0.884	0.884	0.88	0.884	0.886	0.889	0.887	0.889	0.887	0.889	0.889	0.889	0.887	0.887	0.887	0.887	0.887	0.884	0.886	0.881	0.881	0.889	0.889	0.889	0.892	0.888	0.889	0.889	0.888
R4_CloneB7	0.887	0.887	0.887	0.887	0.887	0.889	0.889	0.887	0.887	0.89	0.89	0.889	0.889	0.887	0.887	0.89	0.886	0.886	0.884	0.884	0.884	0.884	0.88	0.884	0.886	0.889	0.887	0.889	0.887	0.889	0.889	0.889	0.887	0.887	0.887	0.887	0.887	0.884	0.886	0.881	0.881	0.889	0.889	0.889	0.892	0.888	0.889	0.889	0.888
R5_CloneC5	0.887	0.887	0.887	0.887	0.887	0.889	0.889	0.887	0.887	0.89	0.89	0.889	0.889	0.887	0.887	0.89	0.886	0.886	0.884	0.884	0.884	0.884	0.88	0.884	0.886	0.889	0.887	0.889	0.887	0.889	0.889	0.889	0.887	0.887	0.887	0.887	0.887	0.884	0.886	0.881	0.881	0.889	0.889	0.889	0.892	0.888	0.889	0.889	0.888
R5_CloneC1	0.887	0.887	0.887	0.887	0.887	0.889	0.889	0.887	0.887	0.89	0.89	0.889	0.889	0.887	0.887	0.89	0.886	0.886	0.884	0.884	0.884	0.884	0.88	0.884	0.886	0.889	0.887	0.889	0.887	0.889	0.889	0.889	0.887	0.887	0.887	0.887	0.887	0.884	0.886	0.881	0.881	0.889	0.889	0.889	0.892	0.888	0.889	0.889	0.888
R4_CloneB8	0.883	0.883	0.883	0.883	0.883	0.884	0.884	0.883	0.883	0.886	0.886	0.884	0.884	0.883	0.883	0.886	0.881	0.881	0.88	0.88	0.88	0.88	0.875	0.88	0.881	0.884	0.883	0.884	0.883	0.884	0.884	0.884	0.883	0.883	0.883	0.883	0.883	0.88	0.881	0.877	0.877	0.884	0.884	0.884	0.887	0.883	0.884	0.884	0.883
Isolate_A252_CloneB1.14	0.889	0.889	0.889	0.889	0.889	0.89	0.89	0.889	0.889	0.892	0.892	0.89	0.89	0.889	0.889	0.892	0.887	0.888	0.889	0.889	0.889	0.889	0.884	0.889	0.891	0.89	0.889	0.89	0.889	0.89	0.89	0.89	0.892	0.892	0.892	0.892	0.892	0.889	0.89	0.886	0.886	0.894	0.894	0.894	0.897	0.892	0.894	0.894	0.892
Isolate_A252_CloneB1.1	0.885	0.885	0.885	0.885	0.885	0.886	0.886	0.885	0.885	0.888	0.888	0.886	0.886	0.885	0.885	0.888	0.886	0.883	0.882	0.882	0.882	0.882	0.877	0.885	0.886	0.886	0.885	0.886	0.885	0.886	0.886	0.886	0.888	0.888	0.888	0.888	0.888	0.885	0.886	0.882	0.882	0.886	0.886	0.886	0.889	0.885	0.886	0.886	0.885
Isolate_A252_CloneB1.2	0.887	0.887	0.887	0.887	0.887	0.889	0.889	0.887	0.887	0.89	0.89	0.889	0.889	0.887	0.887	0.89	0.889	0.886	0.884	0.884	0.884	0.884	0.88	0.887	0.889	0.889	0.887	0.889	0.887	0.889	0.889	0.889	0.89	0.89	0.89	0.89	0.89	0.887	0.889	0.884	0.884	0.889	0.889	0.889	0.892	0.888	0.889	0.889	0.888
Isolate_A252_CloneB1.4	0.883	0.883	0.883	0.883	0.883	0.884	0.884	0.883	0.883	0.886	0.886	0.884	0.884	0.883	0.883	0.886	0.884	0.881	0.88	0.88	0.88	0.88	0.875	0.883	0.884	0.884	0.883	0.884	0.883	0.884	0.884	0.884	0.886	0.886	0.886	0.886	0.886	0.883	0.884	0.88	0.88	0.884	0.884	0.884	0.887	0.883	0.884	0.884	0.883
Isolate_A252_CloneB2.1	0.887	0.887	0.887	0.887	0.887	0.889	0.889	0.887	0.887	0.89	0.89	0.889	0.889	0.887	0.887	0.89	0.889	0.886	0.884	0.884	0.884	0.884	0.88	0.887	0.889	0.889	0.887	0.889	0.887	0.889	0.889	0.889	0.89	0.89	0.89	0.89	0.89	0.887	0.889	0.884	0.884	0.889	0.889	0.889	0.892	0.888	0.889	0.889	0.888
Isolate_A252_CloneB2.3	0.887	0.887	0.887	0.887	0.887	0.889	0.889	0.887	0.887	0.89	0.89	0.889	0.889	0.887	0.887	0.89	0.889	0.886	0.884	0.884	0.884	0.884	0.88	0.887	0.889	0.889	0.887	0.889	0.887	0.889	0.889	0.889	0.89	0.89	0.89	0.89	0.89	0.887	0.889	0.884	0.884	0.889	0.889	0.889	0.892	0.888	0.889	0.889	0.888
Isolate_A252_CloneB5.1	0.886	0.886	0.886	0.886	0.886	0.888	0.888	0.886	0.886	0.889	0.889	0.888	0.888	0.886	0.886	0.889	0.888	0.885	0.883	0.883	0.883	0.883	0.878	0.886	0.888	0.888	0.886	0.888	0.886	0.888	0.888	0.888	0.889	0.889	0.889	0.889	0.889	0.886	0.888	0.883	0.883	0.888	0.888	0.888	0.891	0.886	0.888	0.888	0.886
Isolate_A252_CloneB1.12	0.886	0.886	0.886	0.886	0.886	0.887	0.887	0.886	0.886	0.889	0.889	0.887	0.887	0.886	0.886	0.889	0.887	0.884	0.883	0.883	0.883	0.883	0.878	0.886	0.888	0.887	0.886	0.887	0.886	0.887	0.887	0.887	0.889	0.889	0.889	0.889	0.889	0.886	0.887	0.883	0.883	0.887	0.887	0.887	0.89	0.886	0.887	0.887	0.886
Isolate_A252_CloneB4.8	0.887	0.887	0.887	0.887	0.887	0.889	0.889	0.887	0.887	0.89	0.89	0.889	0.889	0.887	0.887	0.89	0.889	0.886	0.884	0.884	0.884	0.884	0.88	0.887	0.889	0.889	0.887	0.889	0.887	0.889	0.889	0.889	0.89	0.89	0.89	0.89	0.89	0.887	0.889	0.884	0.884	0.889	0.889	0.889	0.892	0.888	0.889	0.889	0.888
Isolate_A252_CloneB5.2	0.887	0.887	0.887	0.887	0.887	0.889	0.889	0.887	0.887	0.89	0.89	0.889	0.889	0.887	0.887	0.89	0.889	0.886	0.884	0.884	0.884	0.884	0.88	0.887	0.889	0.889	0.887	0.889	0.887	0.889	0.889	0.889	0.89	0.89	0.89	0.89	0.89	0.887	0.889	0.884	0.884	0.889	0.889	0.889	0.892	0.888	0.889	0.889	0.888
Isolate_A252_CloneB1.3	0.887	0.887	0.887	0.887	0.887	0.889	0.889	0.887	0.887	0.89	0.89	0.889	0.889	0.887	0.887	0.89	0.889	0.886	0.884	0.884	0.884	0.884	0.88	0.887	0.889	0.889	0.887	0.889	0.887	0.889	0.889	0.889	0.89	0.89	0.89	0.89	0.89	0.887	0.889	0.884	0.884	0.889	0.889	0.889	0.892	0.888	0.889	0.889	0.888
Isolate_A252_CloneB1.15	0.884	0.884	0.884	0.884	0.884	0.886	0.886	0.884	0.884	0.887	0.887	0.886	0.886	0.884	0.884	0.887	0.886	0.883	0.884	0.884	0.884	0.884	0.88	0.884	0.886	0.886	0.884	0.886	0.884	0.886	0.886	0.886	0.887	0.887	0.887	0.887	0.887	0.884	0.886	0.881	0.881	0.889	0.889	0.889	0.892	0.888	0.889	0.889	0.888
Isolate_A252_CloneB2.7	0.886	0.886	0.886	0.886	0.886	0.887	0.887	0.886	0.886	0.889	0.889	0.887	0.887	0.886	0.886	0.889	0.887	0.884	0.883	0.883	0.883	0.883	0.878	0.883	0.884	0.887	0.886	0.887	0.886	0.887	0.887	0.887	0.886	0.886	0.886	0.886	0.886	0.883	0.884	0.88	0.88	0.887	0.887	0.887	0.89	0.886	0.887	0.887	0.886
Isolate_A252_CloneB1.5	0.877	0.877	0.877	0.877	0.877	0.879	0.879	0.877	0.877	0.88	0.88	0.879	0.879	0.877	0.877	0.88	0.879	0.876	0.874	0.874	0.874	0.874	0.869	0.877	0.879	0.879	0.88	0.879	0.877	0.879	0.879	0.879	0.88	0.88	0.88	0.88	0.88	0.877	0.879	0.874	0.874	0.879	0.879	0.879	0.882	0.877	0.879	0.879	0.877
MK881979_Khoyollomyces_ramosus_strain_ZC_31	0.872	0.872	0.872	0.872	0.872	0.872	0.872	0.874	0.874	0.872	0.872	0.874	0.874	0.874	0.869	0.872	0.868	0.872	0.871	0.872	0.872	0.874	0.871	0.872	0.871	0.872	0.871	0.872	0.871	0.872	0.872	0.872	0.874	0.874	0.874	0.874	0.874	0.871	0.874	0.869	0.865	0.869	0.869	0.869	0.872	0.868	0.871	0.869	0.869
MK881985_Khoyollomyces_ramosus_strain_ZC_51	0.872	0.872	0.872	0.872	0.872	0.872	0.872	0.874	0.874	0.872	0.872	0.874	0.874	0.874	0.869	0.872	0.868	0.872	0.871	0.872	0.872	0.874	0.871	0.872	0.871	0.872	0.871	0.872	0.871	0.872	0.872	0.872	0.874	0.874	0.874	0.874	0.874	0.871	0.874	0.869	0.865	0.869	0.869	0.869	0.872	0.868	0.871	0.869	0.869
MK881990_Khoyollomyces_ramosus_strain_ZS_32	0.872	0.872	0.872	0.872	0.872	0.872	0.872	0.874	0.874	0.872	0.872	0.874	0.874	0.874	0.869	0.872	0.868	0.872	0.871	0.872	0.872	0.874	0.871	0.872	0.871	0.872	0.871	0.872	0.871	0.872	0.872	0.872	0.874	0.874	0.874	0.874	0.874	0.871	0.874	0.869	0.865	0.869	0.869	0.869	0.872	0.868	0.871	0.869	0.869
MK881988_Khoyollomyces_ramosus_strain_ZS_22	0.874	0.874	0.874	0.874	0.874	0.874	0.874	0.875	0.875	0.874	0.874	0.875	0.875	0.875	0.871	0.874	0.869	0.874	0.872	0.874	0.874	0.875	0.872	0.874	0.872	0.874	0.872	0.874	0.872	0.874	0.874	0.874	0.875	0.875	0.875	0.875	0.875	0.872	0.875	0.871	0.866	0.871	0.871	0.871	0.874	0.869	0.872	0.871	0.871
MK881983_Khyollomyces_ramosus_strain_ZC_42	0.869	0.869	0.869	0.869	0.869	0.869	0.869	0.871	0.871	0.869	0.869	0.871	0.871	0.871	0.866	0.869	0.865	0.869	0.868	0.869	0.869	0.871	0.868	0.869	0.868	0.869	0.868	0.869	0.868	0.869	0.869	0.869	0.871	0.871	0.871	0.871	0.871	0.868	0.871	0.866	0.862	0.866	0.866	0.866	0.869	0.865	0.868	0.866	0.866
MK881980_Khyollomyces_ramosus_strain_ZC_32	0.874	0.874	0.874	0.874	0.874	0.874	0.874	0.875	0.875	0.874	0.874	0.875	0.875	0.875	0.87	0.874	0.869	0.874	0.872	0.874	0.874	0.875	0.872	0.874	0.872	0.874	0.872	0.874	0.872	0.874	0.874	0.874	0.875	0.875	0.875	0.875	0.875	0.872	0.875	0.87	0.866	0.87	0.87	0.87	0.874	0.869	0.872	0.87	0.871
MK881981_Khoyollomyces_ramosus_strain_ZC_33	0.874	0.874	0.874	0.874	0.874	0.874	0.874	0.875	0.875	0.874	0.874	0.875	0.875	0.875	0.87	0.874	0.869	0.874	0.872	0.874	0.874	0.875	0.872	0.874	0.872	0.874	0.872	0.874	0.872	0.874	0.874	0.874	0.875	0.875	0.875	0.875	0.875	0.872	0.875	0.87	0.866	0.87	0.87	0.87	0.874	0.869	0.872	0.87	0.871
MK881982_Khyollomyces_ramosus_strain_ZC_41	0.874	0.874	0.874	0.874	0.874	0.874	0.874	0.875	0.875	0.874	0.874	0.875	0.875	0.875	0.87	0.874	0.869	0.874	0.872	0.874	0.874	0.875	0.872	0.874	0.872	0.874	0.872	0.874	0.872	0.874	0.874	0.874	0.875	0.875	0.875	0.875	0.875	0.872	0.875	0.87	0.866	0.87	0.87	0.87	0.874	0.869	0.872	0.87	0.871
MK881984_Khoyollomyces_ramosus_strain_ZC_43	0.874	0.874	0.874	0.874	0.874	0.874	0.874	0.875	0.875	0.874	0.874	0.875	0.875	0.875	0.87	0.874	0.869	0.874	0.872	0.874	0.874	0.875	0.872	0.874	0.872	0.874	0.872	0.874	0.872	0.874	0.874	0.874	0.875	0.875	0.875	0.875	0.875	0.872	0.875	0.87	0.866	0.87	0.87	0.87	0.874	0.869	0.872	0.87	0.871
MK881986_Khoyollomyces_ramosus_strain_ZC_53	0.874	0.874	0.874	0.874	0.874	0.874	0.874	0.875	0.875	0.874	0.874	0.875	0.875	0.875	0.87	0.874	0.869	0.874	0.872	0.874	0.874	0.875	0.872	0.874	0.872	0.874	0.872	0.874	0.872	0.874	0.874	0.874	0.875	0.875	0.875	0.875	0.875	0.872	0.875	0.87	0.866	0.87	0.87	0.87	0.874	0.869	0.872	0.87	0.871
MK881992_Khyollomyces_ramosus_strain_ZS_41	0.874	0.874	0.874	0.874	0.874	0.874	0.874	0.875	0.875	0.874	0.874	0.875	0.875	0.875	0.87	0.874	0.869	0.874	0.872	0.874	0.874	0.875	0.872	0.874	0.872	0.874	0.872	0.874	0.872	0.874	0.874	0.874	0.875	0.875	0.875	0.875	0.875	0.872	0.875	0.87	0.866	0.87	0.87	0.87	0.874	0.869	0.872	0.87	0.871
MK881993_Khyollomyces_ramosus_strain_ZS_42	0.874	0.874	0.874	0.874	0.874	0.874	0.874	0.875	0.875	0.874	0.874	0.875	0.875	0.875	0.87	0.874	0.869	0.874	0.872	0.874	0.874	0.875	0.872	0.874	0.872	0.874	0.872	0.874	0.872	0.874	0.874	0.874	0.875	0.875	0.875	0.875	0.875	0.872	0.875	0.87	0.866	0.87	0.87	0.87	0.874	0.869	0.872	0.87	0.871
MK881994_Khoyollomyces_ramosus_strain_ZS_43	0.874	0.874	0.874	0.874	0.874	0.874	0.874	0.875	0.875	0.874	0.874	0.875	0.875	0.875	0.87	0.874	0.869	0.874	0.872	0.874	0.874	0.875	0.872	0.874	0.872	0.874	0.872	0.874	0.872	0.874	0.874	0.874	0.875	0.875	0.875	0.875	0.875	0.872	0.875	0.87	0.866	0.87	0.87	0.87	0.874	0.869	0.872	0.87	0.871
MK881987_Khoyollomyces_ramosus_strain_ZS_21	0.874	0.874	0.874	0.874	0.874	0.874	0.874	0.875	0.875	0.874	0.874	0.875	0.875	0.875	0.87	0.874	0.869	0.874	0.872	0.874	0.874	0.875	0.872	0.874	0.872	0.874	0.872	0.874	0.872	0.874	0.874	0.874	0.875	0.875	0.875	0.875	0.875	0.872	0.875	0.87	0.866	0.87	0.87	0.87	0.874	0.869	0.872	0.87	0.871
MK881991_Khoyollomyces_ramosus_strain_ZS_33	0.874	0.874	0.874	0.874	0.874	0.874	0.874	0.875	0.875	0.874	0.874	0.875	0.875	0.875	0.87	0.874	0.869	0.874	0.872	0.874	0.874	0.875	0.872	0.874	0.872	0.874	0.872	0.874	0.872	0.874	0.874	0.874	0.875	0.875	0.875	0.875	0.875	0.872	0.875	0.87	0.866	0.87	0.87	0.87	0.874	0.869	0.872	0.87	0.871
MW175319_Isolate_X2152_Clone_3	0.874	0.874	0.874	0.874	0.874	0.874	0.874	0.875	0.875	0.874	0.874	0.875	0.875	0.875	0.87	0.874	0.869	0.874	0.872	0.874	0.874	0.875	0.872	0.874	0.872	0.874	0.872	0.874	0.872	0.874	0.874	0.874	0.875	0.875	0.875	0.875	0.875	0.872	0.875	0.87	0.866	0.87	0.87	0.87	0.874	0.869	0.872	0.87	0.871
MW175321_Isolate_X2152_Clone_10	0.872	0.872	0.872	0.872	0.872	0.872	0.872	0.874	0.874	0.872	0.872	0.874	0.874	0.874	0.869	0.872	0.867	0.872	0.87	0.872	0.872	0.874	0.87	0.872	0.871	0.872	0.87	0.872	0.87	0.872	0.872	0.872	0.874	0.874	0.874	0.874	0.874	0.87	0.874	0.869	0.865	0.869	0.869	0.869	0.872	0.868	0.87	0.869	0.869
MW175322_Isolate_X2152_Clone_11	0.872	0.872	0.872	0.872	0.872	0.872	0.872	0.874	0.874	0.872	0.872	0.874	0.874	0.874	0.869	0.872	0.868	0.872	0.871	0.872	0.872	0.874	0.871	0.872	0.871	0.872	0.871	0.872	0.871	0.872	0.872	0.872	0.874	0.874	0.874	0.874	0.874	0.871	0.874	0.869	0.865	0.869	0.869	0.869	0.872	0.868	0.871	0.869	0.869
MW175320_Isolate_X2152_Clone_4	0.87	0.87	0.87	0.87	0.87	0.87	0.87	0.872	0.872	0.87	0.87	0.872	0.872	0.872	0.867	0.87	0.866	0.871	0.869	0.87	0.87	0.872	0.869	0.87	0.869	0.87	0.869	0.87	0.869	0.87	0.87	0.87	0.872	0.872	0.872	0.872	0.872	0.869	0.872	0.867	0.863	0.867	0.867	0.867	0.87	0.866	0.869	0.867	0.869
MW175325_Isolate_X2152_Clone_14	0.874	0.874	0.874	0.874	0.874	0.874	0.874	0.875	0.875	0.874	0.874	0.875	0.875	0.875	0.87	0.874	0.869	0.874	0.872	0.874	0.874	0.875	0.872	0.874	0.872	0.874	0.872	0.874	0.872	0.874	0.874	0.874	0.875	0.875	0.875	0.875	0.875	0.872	0.875	0.87	0.866	0.87	0.87	0.87	0.874	0.869	0.872	0.87	0.871
MW175324_Isolate_X2152_Clone_16	0.871	0.871	0.871	0.871	0.871	0.871	0.871	0.872	0.872	0.871	0.871	0.872	0.872	0.872	0.868	0.871	0.866	0.871	0.869	0.871	0.871	0.872	0.869	0.871	0.869	0.871	0.869	0.871	0.869	0.871	0.871	0.871	0.872	0.872	0.872	0.872	0.872	0.869	0.872	0.868	0.863	0.868	0.868	0.868	0.871	0.866	0.869	0.868	0.868
MW175323_Isolate_X2152_Clone_20	0.872	0.872	0.872	0.872	0.872	0.872	0.872	0.874	0.874	0.872	0.872	0.874	0.874	0.874	0.869	0.872	0.868	0.872	0.871	0.872	0.872	0.874	0.871	0.872	0.871	0.872	0.871	0.872	0.871	0.872	0.872	0.872	0.874	0.874	0.874	0.874	0.874	0.871	0.874	0.869	0.865	0.869	0.869	0.869	0.872	0.868	0.871	0.869	0.869
MK881995_Agriosomyces_longus_strain_BGS13	0.869	0.869	0.869	0.869	0.869	0.869	0.869	0.871	0.871	0.869	0.869	0.871	0.871	0.871	0.869	0.869	0.866	0.87	0.874	0.875	0.875	0.877	0.874	0.877	0.874	0.871	0.869	0.871	0.869	0.871	0.871	0.871	0.871	0.871	0.871	0.871	0.871	0.868	0.871	0.866	0.87	0.866	0.866	0.866	0.869	0.865	0.868	0.866	0.866
MK881996_Agriosomyces_longus_strain_MS2	0.869	0.869	0.869	0.869	0.869	0.869	0.869	0.871	0.871	0.869	0.869	0.871	0.871	0.871	0.869	0.869	0.866	0.87	0.874	0.875	0.875	0.877	0.874	0.877	0.874	0.871	0.869	0.871	0.869	0.871	0.871	0.871	0.871	0.871	0.871	0.871	0.871	0.868	0.871	0.866	0.87	0.866	0.866	0.866	0.869	0.865	0.868	0.866	0.866
HQ703466_Anaeromyces_sp._SSD1	0.895	0.895	0.895	0.895	0.895	0.897	0.897	0.898	0.898	0.898	0.898	0.9	0.9	0.898	0.895	0.901	0.898	0.898	0.898	0.898	0.898	0.901	0.897	0.897	0.897	0.9	0.898	0.9	0.898	0.9	0.9	0.9	0.901	0.901	0.901	0.901	0.901	0.898	0.9	0.895	0.894	0.895	0.895	0.895	0.895	0.894	0.895	0.895	0.894
HQ703468_Anaeromyces_sp._SSD3	0.895	0.895	0.895	0.895	0.895	0.897	0.897	0.898	0.898	0.898	0.898	0.9	0.9	0.898	0.895	0.901	0.898	0.898	0.898	0.898	0.898	0.901	0.897	0.897	0.897	0.9	0.898	0.9	0.898	0.9	0.9	0.9	0.901	0.901	0.901	0.901	0.901	0.898	0.9	0.895	0.894	0.895	0.895	0.895	0.895	0.894	0.895	0.895	0.894
HQ703469_Anaeromyces_sp._SSD4	0.895	0.895	0.895	0.895	0.895	0.897	0.897	0.895	0.895	0.898	0.898	0.897	0.897	0.895	0.895	0.901	0.898	0.895	0.898	0.898	0.898	0.898	0.894	0.897	0.897	0.9	0.898	0.9	0.898	0.9	0.9	0.9	0.901	0.901	0.901	0.901	0.901	0.898	0.9	0.895	0.894	0.895	0.895	0.895	0.895	0.894	0.895	0.895	0.894
HQ703467_Anaeromyces_sp._SSD2	0.895	0.895	0.895	0.895	0.895	0.897	0.897	0.898	0.898	0.898	0.898	0.9	0.9	0.898	0.895	0.898	0.895	0.895	0.895	0.895	0.895	0.898	0.894	0.894	0.894	0.897	0.895	0.897	0.895	0.897	0.897	0.897	0.898	0.898	0.898	0.898	0.898	0.895	0.897	0.892	0.891	0.892	0.892	0.892	0.892	0.891	0.892	0.892	0.891
JX017316_Anaeromyces_sp._SSDBRL1	0.895	0.895	0.895	0.895	0.895	0.897	0.897	0.898	0.898	0.898	0.898	0.9	0.9	0.898	0.895	0.898	0.895	0.895	0.895	0.895	0.895	0.898	0.894	0.894	0.894	0.897	0.895	0.897	0.895	0.897	0.897	0.897	0.898	0.898	0.898	0.898	0.898	0.895	0.897	0.892	0.891	0.892	0.892	0.892	0.892	0.891	0.892	0.892	0.891
JX017317_Anaeromyces_sp._SSDBRL2	0.895	0.895	0.895	0.895	0.895	0.897	0.897	0.898	0.898	0.898	0.898	0.9	0.9	0.898	0.895	0.898	0.895	0.895	0.895	0.895	0.895	0.898	0.894	0.894	0.894	0.897	0.895	0.897	0.895	0.897	0.897	0.897	0.898	0.898	0.898	0.898	0.898	0.895	0.897	0.892	0.891	0.892	0.892	0.892	0.892	0.891	0.892	0.892	0.891
JX017318_Anaeromyces_sp._SSDBRL3	0.895	0.895	0.895	0.895	0.895	0.897	0.897	0.898	0.898	0.898	0.898	0.9	0.9	0.898	0.895	0.898	0.895	0.895	0.895	0.895	0.895	0.898	0.894	0.894	0.894	0.897	0.895	0.897	0.895	0.897	0.897	0.897	0.898	0.898	0.898	0.898	0.898	0.895	0.897	0.892	0.891	0.892	0.892	0.892	0.892	0.891	0.892	0.892	0.891
JN939171_Anaeromyces_cf._mucronatus_ZU2	0.897	0.897	0.897	0.897	0.897	0.898	0.898	0.9	0.9	0.9	0.9	0.901	0.901	0.9	0.897	0.9	0.897	0.897	0.897	0.897	0.897	0.9	0.895	0.895	0.895	0.898	0.897	0.898	0.897	0.898	0.898	0.898	0.9	0.9	0.9	0.9	0.9	0.897	0.898	0.894	0.892	0.894	0.894	0.894	0.894	0.892	0.894	0.894	0.892
HQ703470_Anaeromyces_sp._SSD5	0.897	0.897	0.897	0.897	0.897	0.898	0.898	0.897	0.897	0.9	0.9	0.898	0.898	0.897	0.897	0.903	0.9	0.897	0.9	0.9	0.9	0.9	0.898	0.901	0.901	0.901	0.9	0.901	0.9	0.901	0.901	0.901	0.903	0.903	0.903	0.903	0.903	0.9	0.901	0.897	0.898	0.9	0.9	0.9	0.9	0.898	0.9	0.9	0.898
JN939167_Anaeromyces_mucronatus_ZF1	0.898	0.898	0.898	0.898	0.898	0.9	0.9	0.898	0.898	0.901	0.901	0.9	0.9	0.898	0.898	0.901	0.898	0.895	0.898	0.898	0.898	0.898	0.897	0.9	0.9	0.9	0.898	0.9	0.898	0.9	0.9	0.9	0.901	0.901	0.901	0.901	0.901	0.898	0.9	0.895	0.897	0.898	0.898	0.898	0.898	0.897	0.898	0.898	0.897
JN939170_Anaeromyces_cf._mucronatus_LF1	0.898	0.898	0.898	0.898	0.898	0.9	0.9	0.898	0.898	0.901	0.901	0.9	0.9	0.898	0.898	0.901	0.898	0.895	0.898	0.898	0.898	0.898	0.897	0.9	0.9	0.9	0.898	0.9	0.898	0.9	0.9	0.9	0.901	0.901	0.901	0.901	0.901	0.898	0.9	0.895	0.897	0.898	0.898	0.898	0.898	0.897	0.898	0.898	0.897
JN939169_Anaeromyces_cf._mucronatus_BF1	0.898	0.898	0.898	0.898	0.898	0.9	0.9	0.898	0.898	0.901	0.901	0.9	0.9	0.898	0.898	0.901	0.898	0.895	0.898	0.898	0.898	0.898	0.897	0.9	0.9	0.9	0.898	0.9	0.898	0.9	0.9	0.9	0.901	0.901	0.901	0.901	0.901	0.898	0.9	0.895	0.897	0.898	0.898	0.898	0.898	0.897	0.898	0.898	0.897
KT274172_Anaeromyces_mucronatus_1B	0.898	0.898	0.898	0.898	0.898	0.9	0.9	0.898	0.898	0.901	0.901	0.9	0.9	0.898	0.898	0.901	0.898	0.895	0.898	0.898	0.898	0.898	0.897	0.9	0.9	0.9	0.898	0.9	0.898	0.9	0.9	0.9	0.901	0.901	0.901	0.901	0.901	0.898	0.9	0.895	0.897	0.898	0.898	0.898	0.898	0.897	0.898	0.898	0.897
JN939172_Anaeromyces_cf._mucronatus_JF1	0.897	0.897	0.897	0.897	0.897	0.898	0.898	0.897	0.897	0.9	0.9	0.898	0.898	0.897	0.897	0.9	0.897	0.894	0.897	0.897	0.897	0.897	0.895	0.898	0.898	0.898	0.897	0.898	0.897	0.898	0.898	0.898	0.9	0.9	0.9	0.9	0.9	0.897	0.898	0.894	0.895	0.897	0.897	0.897	0.897	0.895	0.897	0.897	0.895
MF121932_Anaeromyces_contortus_G3J	0.886	0.886	0.886	0.886	0.886	0.888	0.888	0.886	0.886	0.889	0.889	0.888	0.888	0.886	0.886	0.892	0.889	0.886	0.889	0.889	0.889	0.889	0.884	0.891	0.888	0.891	0.889	0.891	0.889	0.891	0.891	0.891	0.894	0.894	0.894	0.894	0.894	0.891	0.892	0.888	0.885	0.888	0.888	0.888	0.888	0.886	0.888	0.888	0.886
MF121940_Anaeromyces_contortus_G3D	0.886	0.886	0.886	0.886	0.886	0.888	0.888	0.886	0.886	0.889	0.889	0.888	0.888	0.886	0.886	0.892	0.889	0.886	0.889	0.889	0.889	0.889	0.884	0.891	0.888	0.891	0.889	0.891	0.889	0.891	0.891	0.891	0.894	0.894	0.894	0.894	0.894	0.891	0.892	0.888	0.885	0.888	0.888	0.888	0.888	0.886	0.888	0.888	0.886
MG605684_Anaeromyces_contortus_G3A	0.884	0.884	0.884	0.884	0.884	0.886	0.886	0.884	0.884	0.888	0.888	0.886	0.886	0.884	0.884	0.891	0.888	0.885	0.888	0.888	0.888	0.888	0.883	0.889	0.886	0.889	0.888	0.889	0.888	0.889	0.889	0.889	0.892	0.892	0.892	0.892	0.892	0.889	0.891	0.886	0.883	0.886	0.886	0.886	0.886	0.885	0.886	0.886	0.885
MF121939_Anaeromyces_contortus_G3I	0.883	0.883	0.883	0.883	0.883	0.884	0.884	0.883	0.883	0.886	0.886	0.884	0.884	0.883	0.883	0.889	0.886	0.883	0.886	0.886	0.886	0.886	0.881	0.888	0.885	0.888	0.886	0.888	0.886	0.888	0.888	0.888	0.891	0.891	0.891	0.891	0.891	0.888	0.889	0.884	0.882	0.884	0.884	0.884	0.884	0.883	0.884	0.884	0.883
MF121934_Anaeromyces_contortus_G3H	0.883	0.883	0.883	0.883	0.883	0.884	0.884	0.883	0.883	0.886	0.886	0.884	0.884	0.883	0.883	0.889	0.886	0.883	0.886	0.886	0.886	0.886	0.881	0.888	0.885	0.888	0.886	0.888	0.886	0.888	0.888	0.888	0.891	0.891	0.891	0.891	0.891	0.888	0.889	0.884	0.882	0.884	0.884	0.884	0.884	0.883	0.884	0.884	0.883
MF121938_Anaeromyces_contortus_G3B	0.877	0.877	0.877	0.877	0.877	0.878	0.878	0.877	0.877	0.88	0.88	0.878	0.878	0.877	0.877	0.883	0.88	0.877	0.88	0.88	0.88	0.88	0.875	0.881	0.879	0.881	0.88	0.881	0.88	0.881	0.881	0.881	0.884	0.884	0.884	0.884	0.884	0.881	0.883	0.878	0.877	0.878	0.878	0.878	0.878	0.877	0.878	0.878	0.877
MG605685_Anaeromyces_contortus_G3C	0.886	0.886	0.886	0.886	0.886	0.888	0.888	0.886	0.886	0.889	0.889	0.888	0.888	0.886	0.886	0.892	0.889	0.886	0.889	0.889	0.889	0.889	0.884	0.891	0.888	0.891	0.889	0.891	0.889	0.891	0.891	0.891	0.892	0.892	0.892	0.892	0.892	0.889	0.891	0.886	0.886	0.886	0.886	0.886	0.886	0.885	0.886	0.886	0.885
MF121937_Anaeromyces_contortus_G3E	0.878	0.878	0.878	0.878	0.878	0.88	0.88	0.878	0.878	0.881	0.881	0.88	0.88	0.878	0.878	0.884	0.881	0.879	0.881	0.881	0.881	0.881	0.877	0.883	0.88	0.883	0.881	0.883	0.881	0.883	0.883	0.883	0.886	0.886	0.886	0.886	0.886	0.883	0.884	0.88	0.877	0.88	0.88	0.88	0.88	0.879	0.88	0.88	0.879
MF121928.1_Anaeromyces_sp._NHY-2018_strain_X5	0.891	0.891	0.891	0.891	0.891	0.892	0.892	0.891	0.891	0.894	0.894	0.892	0.892	0.891	0.891	0.897	0.894	0.891	0.894	0.894	0.894	0.894	0.889	0.895	0.892	0.895	0.894	0.895	0.894	0.895	0.895	0.895	0.897	0.897	0.897	0.897	0.897	0.894	0.895	0.891	0.889	0.891	0.891	0.891	0.891	0.889	0.891	0.891	0.889
MF121933_Anaeromyces_contortus_G3F	0.874	0.874	0.874	0.874	0.874	0.875	0.875	0.874	0.874	0.877	0.877	0.875	0.875	0.874	0.874	0.88	0.877	0.874	0.877	0.877	0.877	0.877	0.872	0.878	0.875	0.878	0.877	0.878	0.877	0.878	0.878	0.878	0.881	0.881	0.881	0.881	0.881	0.878	0.88	0.875	0.874	0.875	0.875	0.875	0.875	0.874	0.875	0.875	0.874
MF121942.1_Anaeromyces_sp._NHY-2018_strain_C3J	0.881	0.881	0.881	0.881	0.881	0.883	0.883	0.881	0.881	0.884	0.884	0.883	0.883	0.881	0.881	0.888	0.884	0.882	0.884	0.884	0.884	0.884	0.88	0.886	0.883	0.886	0.884	0.886	0.884	0.886	0.886	0.886	0.888	0.888	0.888	0.888	0.888	0.884	0.886	0.881	0.882	0.881	0.881	0.881	0.881	0.88	0.881	0.881	0.88
MF121943.1_Anaeromyces_sp._NHY-2018_strain_Na	0.858	0.858	0.858	0.858	0.858	0.86	0.86	0.861	0.861	0.861	0.861	0.863	0.863	0.861	0.858	0.865	0.861	0.862	0.861	0.861	0.861	0.865	0.86	0.861	0.86	0.863	0.861	0.863	0.861	0.863	0.863	0.863	0.865	0.865	0.865	0.865	0.865	0.863	0.863	0.86	0.859	0.858	0.858	0.858	0.858	0.857	0.858	0.858	0.857
MH468763_Liebetanzomyces_polymorphus	0.889	0.889	0.889	0.889	0.889	0.891	0.891	0.892	0.892	0.892	0.892	0.894	0.894	0.892	0.889	0.895	0.892	0.892	0.892	0.892	0.892	0.895	0.891	0.894	0.891	0.894	0.892	0.894	0.892	0.894	0.894	0.894	0.892	0.892	0.892	0.892	0.892	0.889	0.892	0.888	0.888	0.889	0.889	0.889	0.889	0.888	0.886	0.889	0.885
MH468764_Liebetanzomyces_polymorphus	0.889	0.889	0.889	0.889	0.889	0.891	0.891	0.892	0.892	0.892	0.892	0.894	0.894	0.892	0.889	0.895	0.892	0.892	0.892	0.892	0.892	0.895	0.891	0.894	0.891	0.894	0.892	0.894	0.892	0.894	0.894	0.894	0.892	0.892	0.892	0.892	0.892	0.889	0.892	0.888	0.888	0.889	0.889	0.889	0.889	0.888	0.886	0.889	0.885
MK881974_Capellomyces_foraminis_BGB2	0.894	0.894	0.894	0.894	0.894	0.895	0.895	0.897	0.897	0.897	0.897	0.898	0.898	0.897	0.894	0.9	0.897	0.897	0.897	0.897	0.897	0.9	0.895	0.895	0.895	0.898	0.897	0.898	0.897	0.898	0.898	0.898	0.894	0.894	0.894	0.894	0.894	0.891	0.894	0.889	0.892	0.894	0.894	0.894	0.897	0.892	0.894	0.894	0.892
MK881975_Capellomyces_foraminis_BGC11	0.894	0.894	0.894	0.894	0.894	0.895	0.895	0.897	0.897	0.897	0.897	0.898	0.898	0.897	0.894	0.9	0.897	0.897	0.897	0.897	0.897	0.9	0.895	0.895	0.895	0.898	0.897	0.898	0.897	0.898	0.898	0.898	0.894	0.894	0.894	0.894	0.894	0.891	0.894	0.889	0.892	0.894	0.894	0.894	0.897	0.892	0.894	0.894	0.892
MK881976_Capellomyces_foraminis_BGC12	0.892	0.892	0.892	0.892	0.892	0.894	0.894	0.895	0.895	0.895	0.895	0.897	0.897	0.895	0.892	0.898	0.895	0.896	0.895	0.895	0.895	0.898	0.894	0.894	0.894	0.897	0.895	0.897	0.895	0.897	0.897	0.897	0.892	0.892	0.892	0.892	0.892	0.889	0.892	0.888	0.891	0.892	0.892	0.892	0.895	0.891	0.892	0.892	0.891
MK775304_Capellomyces_elongatus_GFKJa1916	0.888	0.888	0.888	0.888	0.888	0.889	0.889	0.891	0.891	0.891	0.891	0.892	0.892	0.891	0.888	0.894	0.891	0.891	0.891	0.891	0.891	0.894	0.889	0.889	0.89	0.892	0.891	0.892	0.891	0.892	0.892	0.892	0.888	0.888	0.888	0.888	0.888	0.885	0.888	0.883	0.887	0.885	0.885	0.885	0.888	0.883	0.885	0.885	0.883
MF121936.1_Anaeromyces_sp._NHY-2018_strain_C3G	0.857	0.857	0.857	0.857	0.857	0.858	0.858	0.86	0.86	0.86	0.86	0.861	0.861	0.86	0.857	0.863	0.86	0.86	0.86	0.86	0.86	0.863	0.858	0.861	0.859	0.861	0.86	0.861	0.86	0.861	0.861	0.861	0.865	0.865	0.865	0.865	0.865	0.861	0.863	0.858	0.857	0.858	0.858	0.858	0.858	0.857	0.858	0.858	0.857
MF121929.1_Anaeromyces_sp._NHY-2018_strain_X4	0.875	0.875	0.875	0.875	0.875	0.877	0.877	0.879	0.879	0.879	0.879	0.88	0.88	0.879	0.875	0.882	0.879	0.879	0.879	0.879	0.879	0.882	0.877	0.88	0.877	0.88	0.879	0.88	0.879	0.88	0.88	0.88	0.882	0.882	0.882	0.882	0.882	0.879	0.88	0.875	0.874	0.875	0.875	0.875	0.875	0.874	0.875	0.875	0.874
MF121935.1_Anaeromyces_sp._NHY-2018_strain_G3G	0.855	0.855	0.855	0.855	0.855	0.857	0.857	0.855	0.855	0.858	0.858	0.857	0.857	0.855	0.855	0.861	0.858	0.856	0.858	0.858	0.858	0.858	0.854	0.86	0.857	0.86	0.858	0.86	0.858	0.86	0.86	0.86	0.86	0.86	0.86	0.86	0.86	0.857	0.858	0.857	0.854	0.858	0.858	0.858	0.858	0.857	0.858	0.858	0.857
JX017314_Oontomyces_anksri_SSDCIB1	0.9	0.9	0.9	0.9	0.9	0.898	0.898	0.897	0.897	0.897	0.897	0.895	0.895	0.897	0.894	0.9	0.897	0.894	0.9	0.903	0.903	0.9	0.901	0.898	0.898	0.898	0.897	0.898	0.897	0.898	0.898	0.898	0.891	0.891	0.891	0.891	0.891	0.888	0.889	0.884	0.897	0.897	0.897	0.897	0.9	0.895	0.897	0.897	0.895
JX017315_Oontomyces_sp._SSDCIB2	0.9	0.9	0.9	0.9	0.9	0.898	0.898	0.897	0.897	0.897	0.897	0.895	0.895	0.897	0.894	0.9	0.897	0.894	0.9	0.903	0.903	0.9	0.901	0.898	0.898	0.898	0.897	0.898	0.897	0.898	0.898	0.898	0.891	0.891	0.891	0.891	0.891	0.888	0.889	0.884	0.897	0.897	0.897	0.897	0.9	0.895	0.897	0.897	0.895
MK881998_Aklioshbomyces_papillarum_strain_WT3	0.871	0.871	0.871	0.871	0.871	0.873	0.873	0.874	0.874	0.874	0.874	0.876	0.876	0.874	0.871	0.874	0.874	0.877	0.873	0.873	0.873	0.876	0.868	0.873	0.873	0.874	0.873	0.874	0.873	0.874	0.874	0.874	0.868	0.868	0.868	0.868	0.868	0.865	0.868	0.863	0.867	0.865	0.865	0.865	0.868	0.864	0.865	0.865	0.864
MK882000_Aklioshbomyces_papillarum_strain_WT1	0.874	0.874	0.874	0.874	0.874	0.875	0.875	0.877	0.877	0.877	0.877	0.879	0.879	0.877	0.874	0.877	0.877	0.88	0.875	0.875	0.875	0.879	0.871	0.875	0.876	0.877	0.875	0.877	0.875	0.877	0.877	0.877	0.871	0.871	0.871	0.871	0.871	0.868	0.871	0.866	0.87	0.868	0.868	0.868	0.871	0.866	0.868	0.868	0.866
MK882002_Aklioshbomyces_papillarum_strain_WT41	0.874	0.874	0.874	0.874	0.874	0.875	0.875	0.877	0.877	0.877	0.877	0.879	0.879	0.877	0.874	0.877	0.877	0.88	0.875	0.875	0.875	0.879	0.871	0.875	0.876	0.877	0.875	0.877	0.875	0.877	0.877	0.877	0.871	0.871	0.871	0.871	0.871	0.868	0.871	0.866	0.87	0.868	0.868	0.868	0.871	0.866	0.868	0.868	0.866
MK882001_Aklioshbomyces_papillarum_strain_WT2	0.874	0.874	0.874	0.874	0.874	0.875	0.875	0.877	0.877	0.877	0.877	0.879	0.879	0.877	0.874	0.877	0.877	0.88	0.875	0.875	0.875	0.879	0.871	0.875	0.876	0.877	0.875	0.877	0.875	0.877	0.877	0.877	0.871	0.871	0.871	0.871	0.871	0.868	0.871	0.866	0.87	0.868	0.868	0.868	0.871	0.866	0.868	0.868	0.866
MK882003_Aklioshbomyces_papillarum_strain_WTS52	0.874	0.874	0.874	0.874	0.874	0.875	0.875	0.877	0.877	0.877	0.877	0.879	0.879	0.877	0.874	0.877	0.877	0.88	0.875	0.875	0.875	0.879	0.871	0.875	0.876	0.877	0.875	0.877	0.875	0.877	0.877	0.877	0.871	0.871	0.871	0.871	0.871	0.868	0.871	0.866	0.87	0.868	0.868	0.868	0.871	0.866	0.868	0.868	0.866
MK882005_Aklioshbomyces_papillarum_strain_WTS54	0.874	0.874	0.874	0.874	0.874	0.875	0.875	0.877	0.877	0.877	0.877	0.879	0.879	0.877	0.874	0.877	0.877	0.88	0.875	0.875	0.875	0.879	0.871	0.875	0.876	0.877	0.875	0.877	0.875	0.877	0.877	0.877	0.871	0.871	0.871	0.871	0.871	0.868	0.871	0.866	0.87	0.868	0.868	0.868	0.871	0.866	0.868	0.868	0.866
MK882006_Aklioshbomyces_papillarum_strain_WTS51	0.874	0.874	0.874	0.874	0.874	0.875	0.875	0.877	0.877	0.877	0.877	0.879	0.879	0.877	0.874	0.877	0.877	0.88	0.875	0.875	0.875	0.879	0.871	0.875	0.876	0.877	0.875	0.877	0.875	0.877	0.877	0.877	0.871	0.871	0.871	0.871	0.871	0.868	0.871	0.866	0.87	0.868	0.868	0.868	0.871	0.866	0.868	0.868	0.866
MK882004_Aklioshbomyces_papillarum_strain_WTS53	0.874	0.874	0.874	0.874	0.874	0.875	0.875	0.877	0.877	0.877	0.877	0.879	0.879	0.877	0.874	0.877	0.877	0.88	0.875	0.875	0.875	0.879	0.871	0.875	0.876	0.877	0.875	0.877	0.875	0.877	0.877	0.877	0.871	0.871	0.871	0.871	0.871	0.868	0.871	0.866	0.87	0.868	0.868	0.868	0.871	0.866	0.868	0.868	0.866
MK881999_Aklioshbomyces_papillarum_strain_WT4	0.873	0.873	0.873	0.873	0.873	0.874	0.874	0.876	0.876	0.876	0.876	0.877	0.877	0.876	0.873	0.876	0.876	0.879	0.874	0.874	0.874	0.877	0.87	0.874	0.877	0.876	0.874	0.876	0.874	0.876	0.876	0.876	0.87	0.87	0.87	0.87	0.87	0.866	0.87	0.865	0.871	0.866	0.866	0.866	0.87	0.865	0.866	0.866	0.865
MW694897.1_Paucimyces_polynucleatus	0.921	0.921	0.921	0.921	0.921	0.923	0.923	0.924	0.924	0.924	0.924	0.926	0.926	0.924	0.921	0.921	0.918	0.923	0.923	0.923	0.923	0.926	0.918	0.918	0.921	0.923	0.921	0.923	0.921	0.923	0.923	0.923	0.915	0.915	0.915	0.915	0.915	0.912	0.915	0.911	0.911	0.903	0.903	0.903	0.906	0.901	0.901	0.903	0.9
MW694898.1_Paucimyces_polynucleatus	0.921	0.921	0.921	0.921	0.921	0.923	0.923	0.924	0.924	0.924	0.924	0.926	0.926	0.924	0.921	0.921	0.918	0.923	0.923	0.923	0.923	0.926	0.918	0.918	0.921	0.923	0.921	0.923	0.921	0.923	0.923	0.923	0.915	0.915	0.915	0.915	0.915	0.912	0.915	0.911	0.911	0.903	0.903	0.903	0.906	0.901	0.901	0.903	0.9
MW694896.1_Paucimyces_polynucleatus	0.921	0.921	0.921	0.921	0.921	0.923	0.923	0.924	0.924	0.924	0.924	0.926	0.926	0.924	0.921	0.921	0.918	0.923	0.923	0.923	0.923	0.926	0.918	0.918	0.921	0.923	0.921	0.923	0.921	0.923	0.923	0.923	0.915	0.915	0.915	0.915	0.915	0.912	0.915	0.911	0.911	0.903	0.903	0.903	0.906	0.901	0.901	0.903	0.9
MF121931.1_Anaeromyces_sp._NHY-2018_strain_O2	0.753	0.753	0.753	0.753	0.753	0.754	0.754	0.753	0.753	0.756	0.756	0.754	0.754	0.753	0.754	0.759	0.756	0.753	0.754	0.754	0.754	0.754	0.748	0.758	0.755	0.758	0.756	0.758	0.756	0.758	0.758	0.758	0.754	0.754	0.754	0.754	0.754	0.751	0.753	0.748	0.752	0.753	0.753	0.753	0.75	0.752	0.753	0.753	0.752
JN874506.1_Gonapodya_prolifera_strain_ATCC_MYA-4800	0.647	0.647	0.647	0.647	0.647	0.649	0.649	0.647	0.647	0.649	0.649	0.647	0.647	0.647	0.649	0.649	0.647	0.645	0.646	0.646	0.646	0.646	0.641	0.65	0.648	0.647	0.646	0.647	0.646	0.647	0.647	0.647	0.653	0.653	0.653	0.653	0.653	0.653	0.652	0.649	0.645	0.647	0.647	0.647	0.649	0.646	0.646	0.647	0.645
[truncated: 196 more columns]
