# Supplementary material for: Isolation and Biochemical Characterization of Six Anaerobic Fungal Strains from Zoo Animal Feces
Source: Microorganisms. 2021 Aug 3;9(8):1655. doi: 10.3390/microorganisms9081655 (PMC8399178; doi:10.3390/microorganisms9081655)
Supplement: Supplementary file 1 [file microorganisms-09-01655-s001.zip › Table S2.xlsx]

## Sheet: Tabelle1
Seq->	AY997042.1 Cyllamyces aberensis isolate AFTOL-ID 846	MF460993.1 Caecomyces sp. JH-2017a strain A	Isolate_PP313_Clone_1	Isolate_PP313_Clone_3	Isolate_PP313_Clone_5	Caecomyces_churrovis_scaffold_6518	Caecomyces_churrovis_scaffold_5703	Caecomyces_churrovis_scaffold_5318	Caecomyces_churrovis_scaffold_5257	Caecomyces_churrovis_scaffold_4866	Caecomyces_churrovis_scaffold_4365	Isolate_PP313_Clone_8	Isolate_PP313_Clone_4	Isolate_PP313_Clone_7	Isolate_PP313_Clone_2	Isolate_PP313_Clone_6	Isolate_PP313_Clone_9	JQ782555.1 Caecomyces sp. CYR	JQ782554.1 Caecomyces sp. CYF	Isolate_G341_Clone_1_MW175298	Isolate_G341_Clone_5_MW175301	Isolate_G341_Clone_7_MW175303	Isolate_G341_Clone_3_MW175299	Isolate_G341_Clone_4_MW175300	Isolate_G341_Clone_8_MW175304	Isolate_G341_Clone_6_MW175302	DQ067604.1 Caecomyces sp. W101 sympodialis	DQ067605.1 Caecomyces communis
AY997042.1 Cyllamyces aberensis isolate AFTOL-ID 846	ID	0.696	0.704	0.704	0.704	0.704	0.696	0.696	0.696	0.696	0.696	0.704	0.704	0.704	0.704	0.704	0.704	0.66	0.646	0.631	0.631	0.631	0.631	0.631	0.622	0.631	0.848	0.649
MF460993.1 Caecomyces sp. JH-2017a strain A	0.696	ID	0.991	0.991	0.991	0.983	1	1	1	1	1	0.991	0.991	0.991	0.991	0.991	0.991	0.87	0.845	0.617	0.617	0.617	0.617	0.617	0.609	0.617	0.724	0.848
Isolate_PP313_Clone_1	0.704	0.991	ID	1	1	0.991	0.991	0.991	0.991	0.991	0.991	1	1	1	1	1	1	0.877	0.853	0.621	0.621	0.621	0.621	0.621	0.613	0.621	0.732	0.856
Isolate_PP313_Clone_3	0.704	0.991	1	ID	1	0.991	0.991	0.991	0.991	0.991	0.991	1	1	1	1	1	1	0.877	0.853	0.621	0.621	0.621	0.621	0.621	0.613	0.621	0.732	0.856
Isolate_PP313_Clone_5	0.704	0.991	1	1	ID	0.991	0.991	0.991	0.991	0.991	0.991	1	1	1	1	1	1	0.877	0.853	0.621	0.621	0.621	0.621	0.621	0.613	0.621	0.732	0.856
Caecomyces_churrovis_scaffold_6518	0.704	0.983	0.991	0.991	0.991	ID	0.983	0.983	0.983	0.983	0.983	0.991	0.991	0.991	0.991	0.991	0.991	0.874	0.849	0.621	0.621	0.621	0.621	0.621	0.613	0.621	0.728	0.852
Caecomyces_churrovis_scaffold_5703	0.696	1	0.991	0.991	0.991	0.983	ID	1	1	1	1	0.991	0.991	0.991	0.991	0.991	0.991	0.87	0.845	0.617	0.617	0.617	0.617	0.617	0.609	0.617	0.724	0.848
Caecomyces_churrovis_scaffold_5318	0.696	1	0.991	0.991	0.991	0.983	1	ID	1	1	1	0.991	0.991	0.991	0.991	0.991	0.991	0.87	0.845	0.617	0.617	0.617	0.617	0.617	0.609	0.617	0.724	0.848
Caecomyces_churrovis_scaffold_5257	0.696	1	0.991	0.991	0.991	0.983	1	1	ID	1	1	0.991	0.991	0.991	0.991	0.991	0.991	0.87	0.845	0.617	0.617	0.617	0.617	0.617	0.609	0.617	0.724	0.848
Caecomyces_churrovis_scaffold_4866	0.696	1	0.991	0.991	0.991	0.983	1	1	1	ID	1	0.991	0.991	0.991	0.991	0.991	0.991	0.87	0.845	0.617	0.617	0.617	0.617	0.617	0.609	0.617	0.724	0.848
Caecomyces_churrovis_scaffold_4365	0.696	1	0.991	0.991	0.991	0.983	1	1	1	1	ID	0.991	0.991	0.991	0.991	0.991	0.991	0.87	0.845	0.617	0.617	0.617	0.617	0.617	0.609	0.617	0.724	0.848
Isolate_PP313_Clone_8	0.704	0.991	1	1	1	0.991	0.991	0.991	0.991	0.991	0.991	ID	1	1	1	1	1	0.877	0.853	0.621	0.621	0.621	0.621	0.621	0.613	0.621	0.732	0.856
Isolate_PP313_Clone_4	0.704	0.991	1	1	1	0.991	0.991	0.991	0.991	0.991	0.991	1	ID	1	1	1	1	0.877	0.853	0.621	0.621	0.621	0.621	0.621	0.613	0.621	0.732	0.856
Isolate_PP313_Clone_7	0.704	0.991	1	1	1	0.991	0.991	0.991	0.991	0.991	0.991	1	1	ID	1	1	1	0.877	0.853	0.621	0.621	0.621	0.621	0.621	0.613	0.621	0.732	0.856
Isolate_PP313_Clone_2	0.704	0.991	1	1	1	0.991	0.991	0.991	0.991	0.991	0.991	1	1	1	ID	1	1	0.877	0.853	0.621	0.621	0.621	0.621	0.621	0.613	0.621	0.732	0.856
Isolate_PP313_Clone_6	0.704	0.991	1	1	1	0.991	0.991	0.991	0.991	0.991	0.991	1	1	1	1	ID	1	0.877	0.853	0.621	0.621	0.621	0.621	0.621	0.613	0.621	0.732	0.856
Isolate_PP313_Clone_9	0.704	0.991	1	1	1	0.991	0.991	0.991	0.991	0.991	0.991	1	1	1	1	1	ID	0.877	0.853	0.621	0.621	0.621	0.621	0.621	0.613	0.621	0.732	0.856
JQ782555.1 Caecomyces sp. CYR	0.66	0.87	0.877	0.877	0.877	0.874	0.87	0.87	0.87	0.87	0.87	0.877	0.877	0.877	0.877	0.877	0.877	ID	0.961	0.626	0.626	0.626	0.626	0.626	0.619	0.626	0.698	0.907
JQ782554.1 Caecomyces sp. CYF	0.646	0.845	0.853	0.853	0.853	0.849	0.845	0.845	0.845	0.845	0.845	0.853	0.853	0.853	0.853	0.853	0.853	0.961	ID	0.615	0.615	0.615	0.615	0.615	0.607	0.615	0.698	0.934
Isolate_G341_Clone_1_MW175298	0.631	0.617	0.621	0.621	0.621	0.621	0.617	0.617	0.617	0.617	0.617	0.621	0.621	0.621	0.621	0.621	0.621	0.626	0.615	ID	1	1	1	1	0.986	1	0.622	0.611
Isolate_G341_Clone_5_MW175301	0.631	0.617	0.621	0.621	0.621	0.621	0.617	0.617	0.617	0.617	0.617	0.621	0.621	0.621	0.621	0.621	0.621	0.626	0.615	1	ID	1	1	1	0.986	1	0.622	0.611
Isolate_G341_Clone_7_MW175303	0.631	0.617	0.621	0.621	0.621	0.621	0.617	0.617	0.617	0.617	0.617	0.621	0.621	0.621	0.621	0.621	0.621	0.626	0.615	1	1	ID	1	1	0.986	1	0.622	0.611
Isolate_G341_Clone_3_MW175299	0.631	0.617	0.621	0.621	0.621	0.621	0.617	0.617	0.617	0.617	0.617	0.621	0.621	0.621	0.621	0.621	0.621	0.626	0.615	1	1	1	ID	1	0.986	1	0.622	0.611
Isolate_G341_Clone_4_MW175300	0.631	0.617	0.621	0.621	0.621	0.621	0.617	0.617	0.617	0.617	0.617	0.621	0.621	0.621	0.621	0.621	0.621	0.626	0.615	1	1	1	1	ID	0.986	1	0.622	0.611
Isolate_G341_Clone_8_MW175304	0.622	0.609	0.613	0.613	0.613	0.613	0.609	0.609	0.609	0.609	0.609	0.613	0.613	0.613	0.613	0.613	0.613	0.619	0.607	0.986	0.986	0.986	0.986	0.986	ID	0.986	0.614	0.603
Isolate_G341_Clone_6_MW175302	0.631	0.617	0.621	0.621	0.621	0.621	0.617	0.617	0.617	0.617	0.617	0.621	0.621	0.621	0.621	0.621	0.621	0.626	0.615	1	1	1	1	1	0.986	ID	0.622	0.611
DQ067604.1 Caecomyces sp. W101 sympodialis	0.848	0.724	0.732	0.732	0.732	0.728	0.724	0.724	0.724	0.724	0.724	0.732	0.732	0.732	0.732	0.732	0.732	0.698	0.698	0.622	0.622	0.622	0.622	0.622	0.614	0.622	ID	0.689
DQ067605.1 Caecomyces communis	0.649	0.848	0.856	0.856	0.856	0.852	0.848	0.848	0.848	0.848	0.848	0.856	0.856	0.856	0.856	0.856	0.856	0.907	0.934	0.611	0.611	0.611	0.611	0.611	0.603	0.611	0.689	ID
